# Supplementary material for: Automated high throughput workflow for rapid implementation of immobilized enzymes in chemical process development
Source: Royal Society of Chemistry journal article supplement (doi:10.1039/d3re00704a), 2024-01-01
Supplement: d3re00704a1.pdf [file d3re00704a1.pdf]

## Electronic Supporting Information (ESI)

### Automated high throughput workflow for rapid implementation of immobilized enzymes in chemical process development

Lukas Schober,<sup>a</sup> Philippe Dreier<sup>a</sup> and Theo Peschke<sup>\*a</sup>

<sup>a</sup>Chemical and Analytical Development, Novartis Pharma AG, 4056-CH Basel, Switzerland

Email: theo.peschke@novartis.com

## Contents

|                                                  |    |
|--------------------------------------------------|----|
| 1. Materials .....                               | 3  |
| 2. Analytics.....                                | 4  |
| 3. High throughput methodologies.....            | 5  |
| 3.1. General considerations .....                | 5  |
| 3.2. Method A0.....                              | 8  |
| Decklayout .....                                 | 8  |
| Variables .....                                  | 8  |
| 3.3. Method A1 .....                             | 9  |
| Decklayout .....                                 | 9  |
| Variables .....                                  | 9  |
| 3.4. Method B1 .....                             | 10 |
| Decklayout .....                                 | 10 |
| Variables .....                                  | 10 |
| 3.5. Method 2 .....                              | 11 |
| Decklayout .....                                 | 11 |
| Variables .....                                  | 11 |
| 3.6. Method 3 .....                              | 12 |
| Decklayout .....                                 | 12 |
| Variables .....                                  | 12 |
| 4. Experimental Part .....                       | 13 |
| 4.1. Cell expression and enzyme preparation..... | 13 |
| 96 well plate format.....                        | 13 |
| Shake flask powder production.....               | 13 |
| 4.2. Workflow overview: Stage 1-4.....           | 14 |
| 4.3. Stage 1: panel screening .....              | 15 |
| 4.4. Stage 2: carrier screening .....            | 26 |

|      |                                                                                      |                                     |
|------|--------------------------------------------------------------------------------------|-------------------------------------|
| 4.5. | Stage 3: immobilization and reaction condition screening .....                       | 29                                  |
| 4.6. | Stage 4: scale up of biocatalytic reduction of acetophenone.....                     | 34                                  |
|      | Scale-Up of covalent immobilization in SPE tubes based on literature conditions      | <b>Error! Bookmark not defined.</b> |
|      | Scale-Up of covalent immobilization in SPE tubes with optimized conditions           | <b>Error! Bookmark not defined.</b> |
|      | Scale-Up of biocatalytic reaction with reaction conditions based on literature ..... | 35                                  |
|      | Scale-Up of biocatalytic reaction with optimized reaction conditions ....            | <b>Error! Bookmark not defined.</b> |
|      | Literature .....                                                                     | 38                                  |

# 1. Materials

Enzyme carriers were purchased from Purolite and Resindion and details are given in table S1. Acetophenone starting material and (S)-, (R)- and rac-phenylethanol reference compounds were purchased from Sigma Aldrich. NADP tetrasodium salt was purchased from Carbosynth Ltd. Isopropanol and Methanol were purchased from Sigma Aldrich. Gluteraldehyde (50 wt%) was purchased from Alfa Aesar. Buffer salts and magnesium chloride were purchased from Sigma Aldrich. All chemicals were used without further purification. Milli-Q ultrapure water was used for preparing aqueous stock solutions and dilutions.

Table S1: Supplier, resin name and functional group of all resins used at the screening stage of this work.

| Supplier  | Resin    | Linker                | Pore diameter | Particle size |
|-----------|----------|-----------------------|---------------|---------------|
| Purolite  | ECR8304F | ethylamino            | 300-600 Å     | 150-300 µm    |
|           | ECR8309F | ethylamino            | 600-1200 Å    | 150-300 µm    |
|           | ECR8315F | ethylamino            | 1200-1800 Å   | 150-300 µm    |
|           | ECR8404F | hexamethylamino       | 300-600 Å     | 150-300 µm    |
|           | ECR8409F | hexamethylamino       | 600-1200 Å    | 150-300 µm    |
|           | ECR8415F | hexamethylamino       | 1200-1800 Å   | 150-300 µm    |
| Resindion | HA113/S  | hexamethylamino       | 200-500 Å     | 100-300 µm    |
|           | HA403/S  | hexamethylamino       | 400-600 Å     | 100-300 µm    |
| Purolite  | ECR8204F | methylepoxy           | 300-600 Å     | 150-300 µm    |
|           | ECR8209F | methylepoxy           | 600-1200 Å    | 150-300 µm    |
|           | ECR8215F | methylepoxy           | 1200-1800 Å   | 150-300 µm    |
|           | MEP/C    | epoxy                 | 1000 Å        | 100-300 µm    |
| Resindion | EP403/S  | methylepoxy           | 400-600 Å     | 100-300 µm    |
|           | HFA403/S | amino elongated-epoxy | 400-600 Å     | 100-300 µm    |

## 2. Analytics

The biocatalytic reduction of acetophenone (**1**) to phenylethanol (**S**)-**2** and (**R**)-**2** was analyzed on an Agilent SFC system with a 1260 DAD WR detector using a Chiralpak AD-3 (3  $\mu$ m, 4.6 mm x 150 mm) column and supercritical CO<sub>2</sub> (A) and Methanol (B) as mobile phase. BPR pressure and temperature was 150 bar and 60 °C respectively. Column temperature was 40 °C and detector wavelength is 210 nm. Retention times of starting material and products as well as experimental relative response factor for each compound is given in table S2.

Table S2: Retention time and relative response factors (RRF) for analyzed compounds.

| Compound                     | Retention time / min | RRF   |
|------------------------------|----------------------|-------|
| Acetophenone                 | 1.79                 | 1     |
| ( <i>R</i> )-1-phenylethanol | 2.22                 | 1.054 |
| ( <i>S</i> )-1-phenylethanol | 2.28                 | 1.054 |

The gradient of the analytical method is given in table S3.

Table S3: Solvent gradient of analytical SFC method.

| Time / min | A / % | B / % | Flow mL/min |
|------------|-------|-------|-------------|
| 0          | 98    | 2     | 2           |
| 1.75       | 70    | 30    | 2           |
| 3          | 70    | 30    | 2           |
| 3.5        | 98    | 2     | 2           |
| 4          | 98    | 2     | 2           |

### 3. High throughput methodologies

#### 3.1. General considerations

For resin that need any form of pre-activation, either with glutaraldehyde (for covalent immobilization with amino-functionalized resins) or metal salts (for affinity immobilization) we use method A0, A1, 2 and 3. For resin that don't require pre-activation we used method B1, 2 and 3 (Figure S1). The respective deck layouts and method parameters are found in the following chapters.

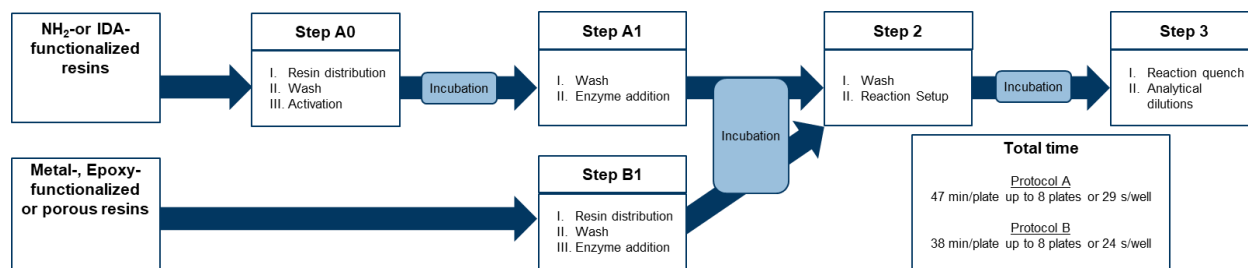

Figure S1: Order of steps for resins requiring pre-activation (e.g. amino- or iminodiacetic acid- functionalized) and requiring no pre-activation (e.g. epoxy-functionalized, metal loaded or porous).

For the resin distribution we developed a methodology that relies on Beckmann 190  $\mu$ L wide bore tips, the tips are filtered to protect the equipment from any accidental solid particles contamination. The resin can be suspended in any kind of reservoir (full reservoir, 12-row or 8-column reservoir, 96 deep well plate) using distilled water. Using the tips, the resin is pipetted from the fully settled slurry at a low speed and transferred to the reaction plate using both trailing and leading air gaps and blowout including tip touch. For small volumes the plate can be briefly centrifuged afterwards. We have validated this approach in the range of 2.5 to 35 mg of resin using between 4 and 60  $\mu$ L of pipetting volume by determining the supernatant volume pipetted in addition to resin during the method (Figure S2). As the non-dried particles mostly consists of water (70-80 % according to manufacturer's analysis) we assumed a density of 1 g/mL for the resin in our consideration.

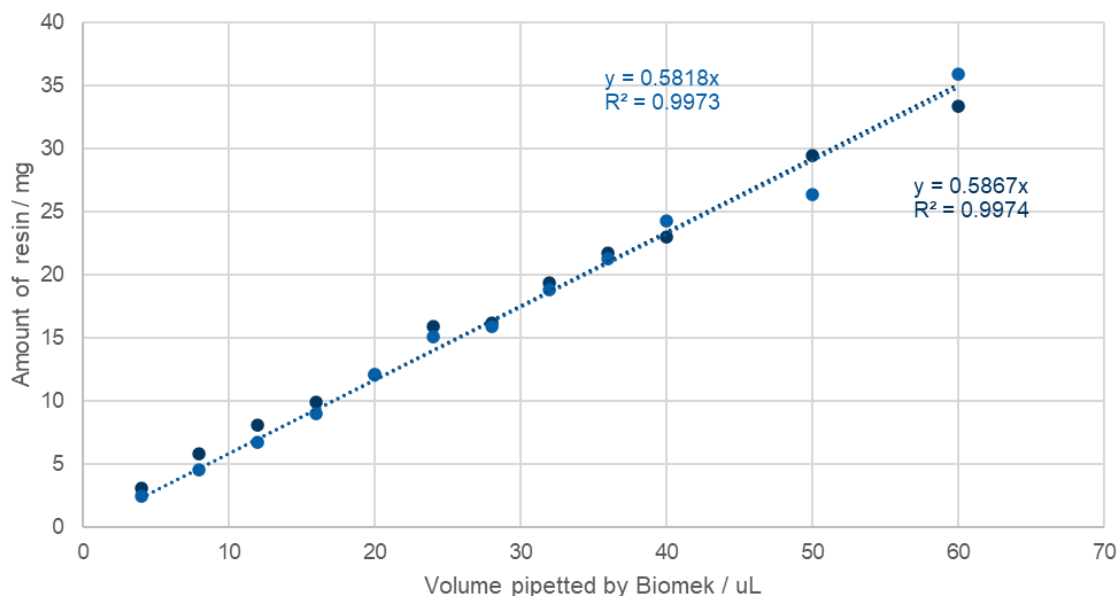

Figure S2: Validation of resin distribution method using Biomek i7. The resin was pipetted using Beckmann 190  $\mu\text{L}$  wide bore tips from a fully settled resin slurry in distilled water. The input volume was pipetted by the liquid handling robot using leading and trailing airgap, blowout and tip touch. Afterwards the supernatant water pipetted by the Biomek was measured and the amount of resin was calculated with  $[\text{amount of resin (mg)}] = [\text{Volume pipetted by Biomek } (\mu\text{L})] - [\text{Supernatant volume } (\mu\text{L})]$  assuming a density of 1 g/mL for the resin. A range of volumes between 4 and 60  $\mu\text{L}$  was pipetted twice, the results are plotted, and linear regression fitted.

The robustness and reproducibility of the HT enzyme production, immobilization and screening can be analyzed by comparing identical enzyme samples across the plates. In table S4 there are all samples of the original backbone enzyme shown on Codexis KRED plate 1 and 2 to illustrate well-to-well and plate-to-plate variation which are both very good for a HT application.

Table S4: Free and immobilized enzyme conversion of KRED parent present in Codexis KRED plate 1 and 2 taken from the data obtained in the initial panel screening.

| KRED          | Plate                | Well | Conversion free enzyme (0.8 vol% lysate) /% | Conversion immobilized enzyme (4 vol% lysate) /% |                                  |
|---------------|----------------------|------|---------------------------------------------|--------------------------------------------------|----------------------------------|
| KRED parent 2 | Codexis KRED plate 1 | E9   | 57.1                                        | 57.2                                             |                                  |
|               |                      | E10  | 62.0                                        | 46.7                                             |                                  |
|               |                      | E11  | 61.5                                        | 51.8                                             |                                  |
|               |                      | E12  | 53.8                                        | 29.3                                             |                                  |
|               | Codexis KRED plate 2 | E3   | 64.1                                        | 50.1                                             |                                  |
|               |                      | E4   | 63.0                                        | 52.6                                             |                                  |
|               |                      | E5   | 63.5                                        | 53.2                                             |                                  |
|               |                      | E6   | 61.7                                        | 54.3                                             |                                  |
|               | <b>Average</b>       |      |                                             | <b>60.9 <math>\pm</math> 3.6</b>                 | <b>49.4 <math>\pm</math> 8.7</b> |

Most notably, we frequently opted to use Integra 8 row or 12 column reservoirs when setting up 2D screenings and more complex immobilization/reaction varying parameters. For example, when screening the immobilization conditions in step 3 of our workflow we prepared glutaraldehyde stock solutions in an 8-row reservoir and used it instead of the standard reservoir to add the reagent to the reaction plate (method A0), resulting in a glutaraldehyde gradient from top to bottom. Following this we prepared enzyme dilutions in a 12-column reservoir (method A1) which resulted in an enzyme gradient from left to right. The results of this approach can be found in main paper's figure 5.

If not otherwise mentioned in the experimental part, default values for each parameter were used. With regards to the settling time before removing the supernatant, we found that for all particles used in the screening 20 seconds of settling time is sufficient after mixing, this value might be adapted based on the resin properties. In case multiple reaction plates (up to 8) are processed in a method the plates are stacked to allow for a streamlined handling and maximize deck space utilization. Glutaraldehyde activation and Methanol quenching steps were performed on an Biomek i7 liquid handling robot under the fumehood. All other steps were performed on an integrated Biomek i7 liquid handling robot with UV/VIS spectrophotometer and sealing device.

## 3.2. Method A0

### Decklayout

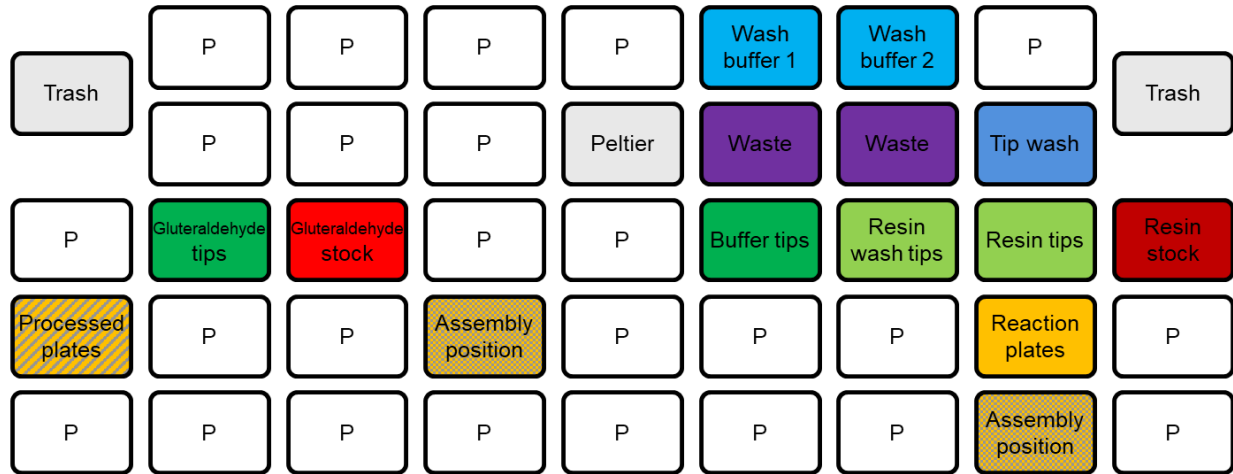

### Variables

| Materials            |                                                                                        | Variables default value (value range)             |                |
|----------------------|----------------------------------------------------------------------------------------|---------------------------------------------------|----------------|
| Reaction plates      | Corning 96 well round bottom PP plates                                                 | NumberOfReactionPlates                            | 8 (1-8)        |
| Wash buffer 1 & 2    | Seahorse Reservoir                                                                     | SealPlates<br><i>only on integrated Biomek i7</i> | yes (yes v no) |
| Tip wash             | Seahorse Reservoir                                                                     | VolumeActivationReagent                           | 100 (20-200)   |
| Waste                | Seahorse Reservoir                                                                     | VolumeResin                                       | 40 (4-60)      |
| Glutaraldehyde stock | Seahorse Reservoir or Integra column/row reservoir                                     | VolumeResinWash                                   | 150 (20-200)   |
| Resin stock          | Seahorse Reservoir or Integra column/row reservoir                                     | VolumeMix                                         | 80 (20-100)    |
| Resin tips           | Beckman Coulter Biomek i-series 190 $\mu$ L pipette tips, wide bore, filtered          |                                                   |                |
| Resin wash tips      | Beckman Coulter Biomek i-series 190 $\mu$ L pipette tips, wide bore, sterile, filtered |                                                   |                |
| Buffer tips          | Beckman Coulter Biomek i-series 230 $\mu$ L pipette tips, non-sterile                  |                                                   |                |
| Glutaraldehyde tips  | Beckman Coulter Biomek i-series 230 $\mu$ L pipette tips, non-sterile                  |                                                   |                |



### 3.3. Method A1

#### Decklayout

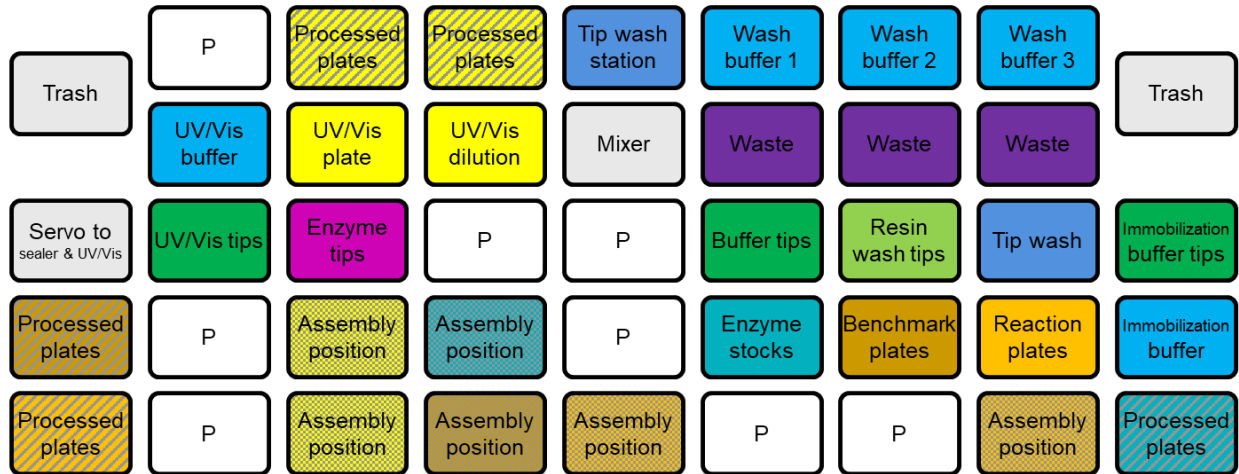

#### Variables

| Materials                  |                                                                                   | Variables default value (value range)             |                |
|----------------------------|-----------------------------------------------------------------------------------|---------------------------------------------------|----------------|
| Reaction plates            | Corning plate 96 well round bottom PP                                             | NumberOfReactionPlates                            | 8 (1-8)        |
| Benchmark plates           | Corning plate 96 well round bottom PP                                             | SealPlates<br><i>only on integrated Biomek i7</i> | yes (yes v no) |
| Enzyme stocks              | Biorad plate 96 well PCR hard-shell                                               | DilutionFactor1                                   | 10 (5-20)      |
| UV/Vis plates              | Nunc plate 96 well flat bottom, UV transparent                                    | DilutionFactor2                                   | 10 (2-20)      |
| UV/Vis dilutions           | Nunc plate 96 well flat bottom, non-UV transmissible                              | OverallVolumeDilution1                            | 200 (100-250)  |
| Wash buffer 1, 2 & 3       | Seahorse Reservoir                                                                | OverallVolumeDilution2                            | 200 (100-250)  |
| Tip wash                   | Seahorse Reservoir                                                                | VolumeActivation                                  | 125 (45-225)   |
| Waste                      | Seahorse Reservoir                                                                | VolumeResinWash                                   | 150 (20-200)   |
| Immobilization buffer      | Seahorse Reservoir or Integra column/row reservoir                                | VolumeMix                                         | 80 (20-100)    |
| UV/Vis buffer              | Seahorse Reservoir                                                                | VolumeImmoBuffer                                  | 50 (10-200)    |
| Resin wash tips            | Beckman Coulter Biomek i-series 190 µL pipette tips, wide bore, sterile, filtered | VolumeLysateImmo                                  | 50 (10-80)     |
| Buffer tips                | Beckman Coulter Biomek i-series 230 µL pipette tips, non-sterile                  | VolumeLysateBM                                    | 10 (10-80)     |
| Immobilization buffer tips | Beckman Coulter Biomek i-series 230 µL pipette tips, non-sterile                  |                                                   |                |
| Enzyme tips                | Beckman Coulter Biomek i-series 90 µL pipette tips, non-sterile                   |                                                   |                |
| UV/Vis tips                | Beckman Coulter Biomek i-series 230 µL pipette tips, non-sterile                  |                                                   |                |

### 3.4. Method B1

#### Decklayout

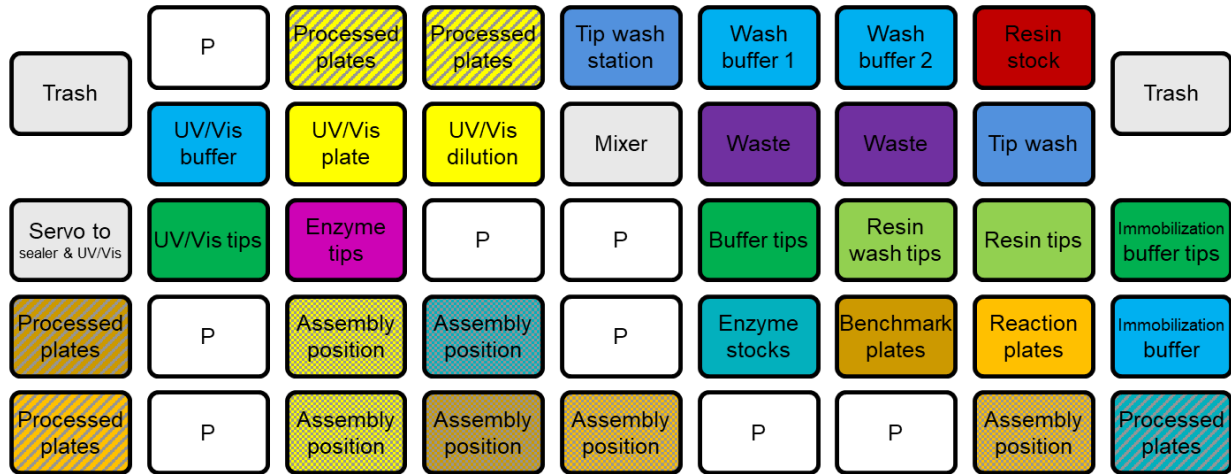

#### Variables

| Materials                  |                                                                                        | Variables default value (value range)             |                |
|----------------------------|----------------------------------------------------------------------------------------|---------------------------------------------------|----------------|
| Reaction plates            | Corning plate 96 well round bottom PP                                                  | NumberOfReactionPlates                            | 8 (1-8)        |
| Benchmark plates           | Corning plate 96 well round bottom PP                                                  | SealPlates<br><i>only on integrated Biomek i7</i> | yes (yes v no) |
| Enzyme stocks              | Biorad plate 96 well PCR hard-shell                                                    | VolumeResin                                       | 40 (4-60)      |
| UV/Vis plates              | Nunc plate 96 well flat bottom, UV transparent                                         | DilutionFactor1                                   | 10 (5-20)      |
| UV/Vis dilutions           | Nunc plate 96 well flat bottom, non-UV transmissible                                   | DilutionFactor2                                   | 10 (2-20)      |
| Wash buffer 1, 2 & 3       | Seahorse Reservoir                                                                     | OverallVolumeDilution1                            | 200 (100-250)  |
| Tip wash                   | Seahorse Reservoir                                                                     | OverallVolumeDilution2                            | 200 (100-250)  |
| Waste                      | Seahorse Reservoir                                                                     | VolumeActivation                                  | 125 (45-225)   |
| Immobilization buffer      | Seahorse Reservoir or Integra column/row reservoir                                     | VolumeResinWash                                   | 150 (20-200)   |
| UV/Vis buffer              | Seahorse Reservoir                                                                     | VolumeMix                                         | 80 (20-100)    |
| Resin stock                | Seahorse Reservoir or Integra column/row reservoir                                     | VolumeImmoBuffer                                  | 50 (10-200)    |
| Resin tips                 | Beckman Coulter Biomek i-series 190 $\mu$ L pipette tips, wide bore, filtered          | VolumeLysateImmo                                  | 50 (10-80)     |
| Resin wash tips            | Beckman Coulter Biomek i-series 190 $\mu$ L pipette tips, wide bore, sterile, filtered | VolumeLysateBM                                    | 10 (10-80)     |
| Buffer tips                | Beckman Coulter Biomek i-series 230 $\mu$ L pipette tips, non-sterile                  |                                                   |                |
| Immobilization buffer tips | Beckman Coulter Biomek i-series 230 $\mu$ L pipette tips, non-sterile                  |                                                   |                |
| Enzyme tips                | Beckman Coulter Biomek i-series 90 $\mu$ L pipette tips, non-sterile                   |                                                   |                |
| UV/Vis tips                | Beckman Coulter Biomek i-series 230 $\mu$ L pipette tips, non-sterile                  |                                                   |                |

### 3.5. Method 2

#### Decklayout

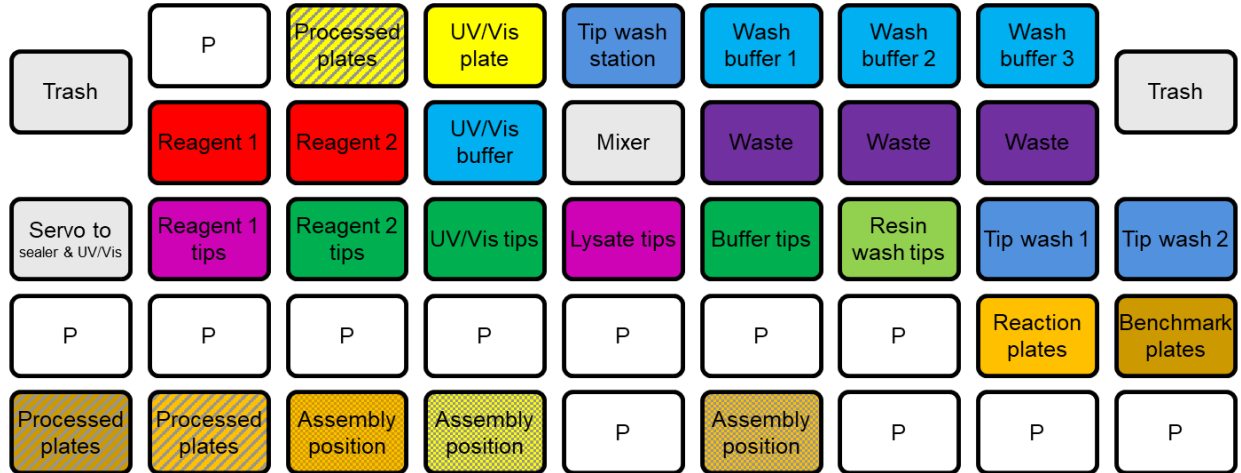

#### Variables

| Materials             |                                                                                   | Variables default value (value range)             |                |
|-----------------------|-----------------------------------------------------------------------------------|---------------------------------------------------|----------------|
| Reaction plates       | Corning plate 96 well round bottom PP                                             | NumberOfReactionPlates                            | 8 (1-8)        |
| Benchmark plates      | Corning plate 96 well round bottom PP                                             | SealPlates<br><i>only on integrated Biomek i7</i> | yes (yes v no) |
| UV/Vis plates         | Nunc plate 96 well flat bottom, UV transparent                                    | DilutionFactor1                                   | 10 (5-20)      |
| Reagent 1             | Seahorse Reservoir or Nunc plate 96 well flat bottom, non-UV transmissible        | OverallVolumeDilution1                            | 200 (100-250)  |
| Reagent 2             | Seahorse Reservoir or Nunc plate 96 well flat bottom, non-UV transmissible        | VolumeImmobilization                              | 125 (45-225)   |
| Wash buffer 1, 2 & 3  | Seahorse Reservoir                                                                | VolumeResinWash                                   | 150 (20-200)   |
| Tip wash              | Seahorse Reservoir                                                                | VolumeMix                                         | 80 (20-100)    |
| Waste                 | Seahorse Reservoir                                                                | VolumeImmoBuffer                                  | 50 (10-200)    |
| Immobilization buffer | Seahorse Reservoir or Integra column/row reservoir                                | VolumeLysateImmo                                  | 50 (10-80)     |
| UV/Vis buffer         | Seahorse Reservoir                                                                | VolumeLysateBM                                    | 10 (10-80)     |
| Reagent 1 tips        | Beckman Coulter Biomek i-series 90 µL pipette tips, non-sterile                   | Reagent1BM                                        | yes (yes v no) |
| Reagent 2 tips        | Beckman Coulter Biomek i-series 230 µL pipette tips, non-sterile                  | Reagent1Immo                                      | no (yes v no)  |
| Resin wash tips       | Beckman Coulter Biomek i-series 190 µL pipette tips, wide bore, sterile, filtered | Reagent2BM                                        | yes (yes v no) |
| Buffer tips           | Beckman Coulter Biomek i-series 230 µL pipette tips, non-sterile                  | Reagent2Immo                                      | yes (yes v no) |
| Enzyme tips           | Beckman Coulter Biomek i-series 90 µL pipette tips, non-sterile                   | VolumeReagent1Immo                                | 0 (10-80)      |
| UV/Vis tips           | Beckman Coulter Biomek i-series 230 µL pipette tips, non-sterile                  | VolumeReagent1BM                                  | 15 (10-80)     |
|                       |                                                                                   | VolumeReagent2Immo                                | 100 (20-200)   |
|                       |                                                                                   | VolumeReagent2BM                                  | 100 (20-200)   |

### 3.6. Method 3

#### Decklayout

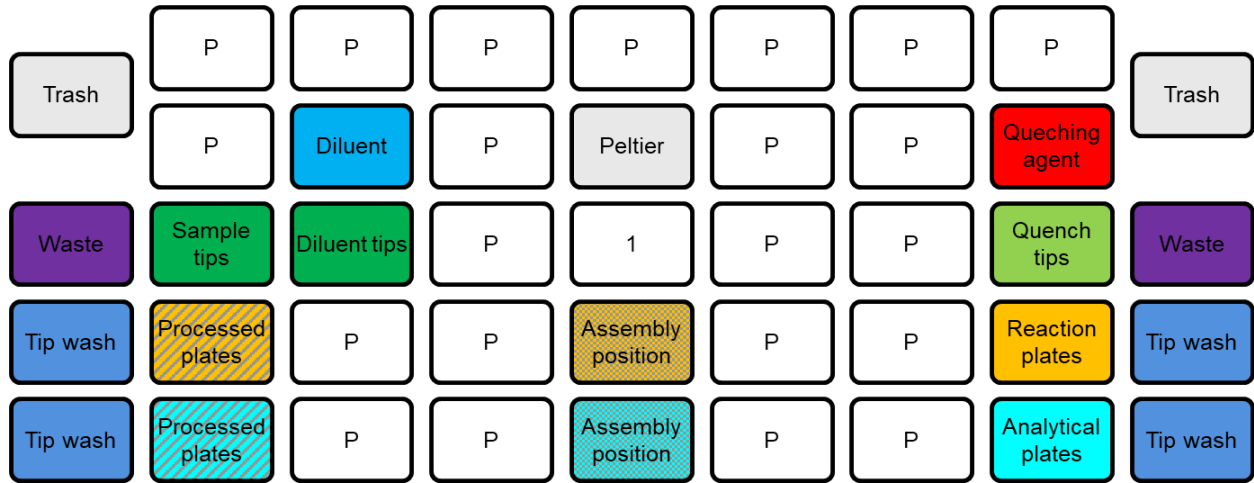

#### Variables

| Materials         |                                                                                         | Variables default value (value range) |               |
|-------------------|-----------------------------------------------------------------------------------------|---------------------------------------|---------------|
| Reaction plates   | Corning plate 96 well round bottom PP                                                   | NumberofReactionPlates                | 8 (1-8)       |
| Analytical plates | Greiner plate 96 well V-bottom PP                                                       | Buffer time                           | 0 (0-1000)    |
| Tip wash          | Seahorse Reservoir                                                                      | DilutionFactor                        | 5 (5-20)      |
| Waste             | Seahorse Reservoir                                                                      | OverallVolumeDilution                 | 200 (100-250) |
| Quenching agent   | Seahorse Reservoir                                                                      | VolumeQuench                          | 125 (50-175)  |
| Diluent           | Seahorse Reservoir                                                                      | VolumeReaction                        | 125 (50-225)  |
| Quench tips       | Beckman Coulter Biomek i-series<br>190 µL pipette tips, wide bore, sterile,<br>filtered | VolumeMix                             | 80 (20-100)   |
| Diluent tips      | Beckman Coulter Biomek i-series<br>230 µL pipette tips, non-sterile                     | WashSteps                             | 3 (1-3)       |
| Sample tips       | Beckman Coulter Biomek i-series<br>230 µL pipette tips, non-sterile                     |                                       |               |

## 4. Experimental Part

### 4.1. Cell expression and enzyme preparation

#### 96 well plate format

To grow the screening plates in a 96 well plate format for Stage 1 and 2 of our workflow NUNC microwell 96 flat bottom plates (Thermo scientific, 243656) were filled with 180  $\mu$ L LB media (Teknova, L8000) containing 1% glucose (Teknova, G0550), 30  $\mu$ g/mL Chloramphenicol and Codexis KRED Plate 1,2 and 4 was supplemented with 2 mM  $MgSO_4$  (Sigma Aldrich) and Codexis KRED Plate 3 was supplemented with 100  $\mu$ M  $ZnSO_4$  (Sigma Aldrich). Then the cells were copied from glycerol stocks of the screening plates with a disposable replica plater. Plates were sealed with breathable seal and incubated in a shaker at 200 rpm, 30 °C and 85%rH overnight.

For subculturing Costar Assay block 2 ml 96 well square V bottom (VWR, 3960) were filled with 390  $\mu$ L TB media (Teknova, T7060) containing 30  $\mu$ g/mL Chloramphenicol and Codexis KRED Plate 1,2 and 4 was supplemented with 2 mM  $MgSO_4$  and Codexis KRED Plate 3 was supplemented with 100  $\mu$ M  $ZnSO_4$ . Then 10  $\mu$ L of overnight culture was added. Plates were sealed with breathable seal (Adhesive film for culture plates, porous, VWR) and put into shaker at 250 rpm, 30 °C and 85%rH until OD 0.4-0.8 was reached. For induction 40  $\mu$ L of 10 mM IPTG solution (Teknova, I3502, 1M) was added to reach a final concentration of 1 mM. Plates were sealed with breathable seal and incubated at 250 rpm, 30 °C and 85%rH for 16-20 hours.

For harvesting the plates were centrifuged for 10 min at 4000g and 4 °C. Media were removed and the plates stored at -80 °C until further use.

For cell lysis plates were thawed and 300  $\mu$ L lysis buffer (20 mM TEoA buffer pH 7.5 + 2 mM  $MgSO_4$  or 100  $\mu$ M  $ZnSO_4$ , 1mg/mL lysozyme (Lysozyme from chicken egg white, Sigma Aldrich, LL6876-100g), 0.5 mg/mL PMBS (Polymixin B Sulphate, Apollo Scientific, BIP0145) 0.1uL/mL DNaseI (New England Biolabs, M030L, 2000 U/mL)) was added before incubation for 2 hours. Plates are centrifuged for 30 min at 4000g and 4 °C and lysate is diluted according to the immobilization protocol.

#### Shake flask powder (SFP) production

To produce shake flask powder for stage 2, 3 and 4 of our workflow a 100 mL baffled shake flask filled with 25 mL LB media containing 1% glucose, 30  $\mu$ g/mL Chloramphenicol and was supplemented with 2 mM  $MgSO_4$  (as all of them originate from Codexis plate 1, 2 or 4). The shake flasks were incubated at 250 rpm and 30 °C overnight.

For subculturing 1 L baffled shake flasks were filled with 250 mL TB media containing 30  $\mu$ g/mL Chloramphenicol and was supplemented with 2 mM  $MgSO_4$  (as all of them originate from Codexis plate 1, 2 or 4). The shake flasks were inoculated with 5 mL preculture and incubated at 250 rpm until OD 0.6-0.8 is reached. For induction 250  $\mu$ L of 1 M IPTG solution (final concentration 1 mM) was added and the cultures were incubated at 250 rpm, 30 °C for 16-20 hours.

For harvesting the cultures were centrifuged for 10 min at 4000g and 4 °C. Cell pellets are resuspended in 50 mM TEoA buffer pH 7 and processed in the microfluidizer (Microfluidizer LM200) for cell lysis. Cell fragments are separated from the lysate by centrifugation for 30 min at 12000g and 4 °C. The lysate is lyophilized (VirTis SP Scientific Advantage Pro with Intellitronics) overnight and stored at -20 °C until further use. We typically achieved 30 wt% protein content after lyophilization that is used to calculate the protein loading for the enzyme immobilization.

## 4.2. Workflow overview: Stage 1-4

An overview over the full workflow is given in figure S3.

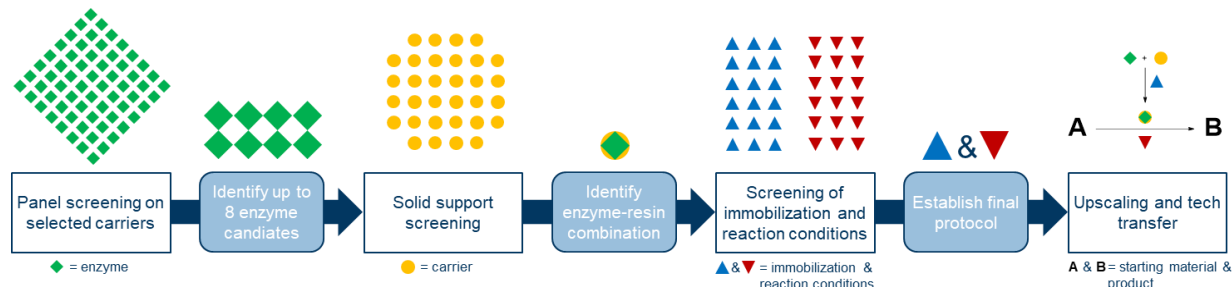

Figure S3: Individual steps of the streamlined high throughput workflow for rapid application of immobilized enzymes in pharma process development. First step is the panel screening to identify suitable enzyme candidates (green diamond) based on selected parameters, e.g., conversion, selectivity or recovered activity. Up to eight candidates are carried forward in the second stage of the workflow where differently functionalized supports (yellow circles) are investigated. Upon identification of the final enzyme-carrier combination the immobilization (blue triangle) and reaction (red triangle) parameters are optimized in the penultimate stage before a final scale-up gives verification of the parameters identified in the high-throughput screening prior to a potential tech transfer.

For the automated high throughput workflow, we obtained the conversion for the immobilized enzyme and for a corresponding free enzyme benchmark reaction. Since we use less volume of enzyme solution in the benchmark (10  $\mu\text{L}$ ) than in the immobilization (50  $\mu\text{L}$ ) this must be considered. We therefore determine the recovered activity (activity recovery) using the following formula.

$$\text{Recovered activity [\%]} = \frac{\text{conversion}_{\text{immobilized enzyme}}[\%] \cdot \text{Volume}_{\text{enzyme solution for free enzyme reaction}}}{\text{conversion}_{\text{immobilized enzyme}}[\%] \cdot \text{Volume}_{\text{enzyme solution for immobilization}}} \cdot 100$$

In addition, we can quantify the protein content of the supernatant using UV/Vis spectroscopy to estimate the immobilization yield. While this value can be of interest in some cases, we observed a color change of the supernatant when using glutaraldehyde activation which renders the results inconclusive for this study. In general, we consider the recovered activity more important for process development because it directly translate to costs while immobilization yield and efficiency is more generally informative.

$$\text{Immobilization yield [\%]} = \frac{\text{protein conc.}_{\text{supernatant after immobilization}} [\text{mg/mL}] \cdot \text{dilution factor}}{\text{protein conc.}_{\text{supernatant before immobilization}} [\text{mg/mL}] \cdot \text{dilution factor}} \cdot 100$$

Having determined these two values one could calculate the immobilization efficiency as the last of the three values frequently reported in enzyme immobilization studies.<sup>1</sup>

$$\text{Immobilization efficiency [\%]} = \frac{\text{Immobilization yield [\%]}}{\text{Recovered activity [\%]}} \cdot 100$$

### 4.3. Stage 1: panel screening

Table S5: Individual experimental steps carried out by the liquid handling robot for panel screening (stage 1 of the presented workflow) using method A0, A1, 2 and 3.

| Step | Method     | Reagents                                                                                                                                                                                                                                                                                                                    | Description                                                                                                                                                                                                                                                                                                                                                                     |
|------|------------|-----------------------------------------------------------------------------------------------------------------------------------------------------------------------------------------------------------------------------------------------------------------------------------------------------------------------------|---------------------------------------------------------------------------------------------------------------------------------------------------------------------------------------------------------------------------------------------------------------------------------------------------------------------------------------------------------------------------------|
| 1    | A0         | Purolite ECR8304F Resin<br>(suspension in distilled water)                                                                                                                                                                                                                                                                  | Distributes resin (25 mg) from reservoir to reaction plate                                                                                                                                                                                                                                                                                                                      |
| 2    | A0         | Distilled water                                                                                                                                                                                                                                                                                                             | Washes resin 4 times                                                                                                                                                                                                                                                                                                                                                            |
| 3    | A0         | 25 g/L Glutaraldehyde in water                                                                                                                                                                                                                                                                                              | Adds 100 $\mu$ L 25 g/L glutaraldehyde to reaction plate<br><br>Final activation conditions:<br>200 mg/mL Resin<br>10 wt% Glutaraldehyde loading based on resin<br>in<br>water<br>Final immobilization volume 125 $\mu$ L                                                                                                                                                       |
| 4    | Incubation |                                                                                                                                                                                                                                                                                                                             | Seal plate and incubate 2h at 250 rpm and 25 °C                                                                                                                                                                                                                                                                                                                                 |
| 5    | A1         | 50 mM TEoA buffer pH 7.5 + 2 mM<br>MgSO <sub>4</sub> /100 $\mu$ M ZnSO <sub>4</sub>                                                                                                                                                                                                                                         | Washes resin 4 times                                                                                                                                                                                                                                                                                                                                                            |
| 6    | A1         | 50 mM TEoA buffer pH 7.5 + 2 mM<br>MgSO <sub>4</sub> /100 $\mu$ M ZnSO <sub>4</sub>                                                                                                                                                                                                                                         | Adds 50 $\mu$ L Immobilization buffer                                                                                                                                                                                                                                                                                                                                           |
| 7    | A1         | Cell lysate (100% or 10%)                                                                                                                                                                                                                                                                                                   | Adds 50 $\mu$ L (diluted) cell lysate to reaction plates<br>Transfer 10 $\mu$ L sample to lysate benchmark plates<br><br>Final immobilization conditions:<br>200 mg/mL Resin<br>lysate concentration of 40 vol% or 4 vol%<br>in<br>50 mM TEoA buffer pH 7.5 + 2 mM MgSO <sub>4</sub> /100 $\mu$ M ZnSO <sub>4</sub><br>Final immobilization volume 125 $\mu$ L                  |
| 8    | Incubation |                                                                                                                                                                                                                                                                                                                             | Seal reaction plate and incubate 18h at 250 rpm and 25 °C<br>Seal lysate benchmark plate and store at 4°C until the reaction is<br>setup in Step 2                                                                                                                                                                                                                              |
| 9    | 2          | <i>Wash buffer 1:</i><br>500 mM sodium chloride solution<br><i>Wash buffer 2:</i><br>20 mM 20 mM TEoA buffer pH 7.5 +<br>2 mM MgSO <sub>4</sub> /100 $\mu$ M ZnSO <sub>4</sub><br><i>Wash buffer 3:</i><br>100 mM TEoA buffer pH 7.5 + 2 mM<br>MgSO <sub>4</sub> /100 $\mu$ M ZnSO <sub>4</sub>                             | Washes resin in total 5 times, 2x wash buffer 1, 2x wash buffer 2,<br>1x wash buffer 3                                                                                                                                                                                                                                                                                          |
| 10   | 2          | <i>Reagent 1:</i><br>100 mM TEoA buffer pH 7.5 + 2 mM<br>MgSO <sub>4</sub> /100 $\mu$ M ZnSO <sub>4</sub><br><i>Reagent 2:</i><br>12.5 g/L Acetophenone<br>0.625 g/L NADP <sup>+</sup> disodium salt<br>12.5 vol% isopropanol<br>in<br>100 mM TEoA buffer pH 7.5 + 2 mM<br>MgSO <sub>4</sub> /100 $\mu$ M ZnSO <sub>4</sub> | Adds 15 $\mu$ L reagent to ONLY to the benchmark plates<br>Adds 100 $\mu$ L reagent to reaction AND benchmark plates<br><br>Final reaction conditions:<br>10 g/L Acetophenone<br>0.5 g/L NADP <sup>+</sup> disodium salt<br>10 vol% isopropanol<br>in<br>100 mM TEoA buffer pH 7.5 + 2 mM MgSO <sub>4</sub> /100 $\mu$ M ZnSO <sub>4</sub><br>Final reaction volume 125 $\mu$ L |
| 11   | Incubation |                                                                                                                                                                                                                                                                                                                             | Seal reaction plate and incubate 4h at 250 rpm and 25 °C                                                                                                                                                                                                                                                                                                                        |
| 12   | 3          | MeOH                                                                                                                                                                                                                                                                                                                        | Quenches reaction plate with 125 $\mu$ L MeOH (1:1 dilution)                                                                                                                                                                                                                                                                                                                    |
| 13   | 3          | MeOH                                                                                                                                                                                                                                                                                                                        | Dilutes the reaction mixture in the analytical plate (1:10) for a final<br>analytical dilution auf 1:20                                                                                                                                                                                                                                                                         |
| 14   | Analytcs   |                                                                                                                                                                                                                                                                                                                             | Run sample analysis on SFC                                                                                                                                                                                                                                                                                                                                                      |

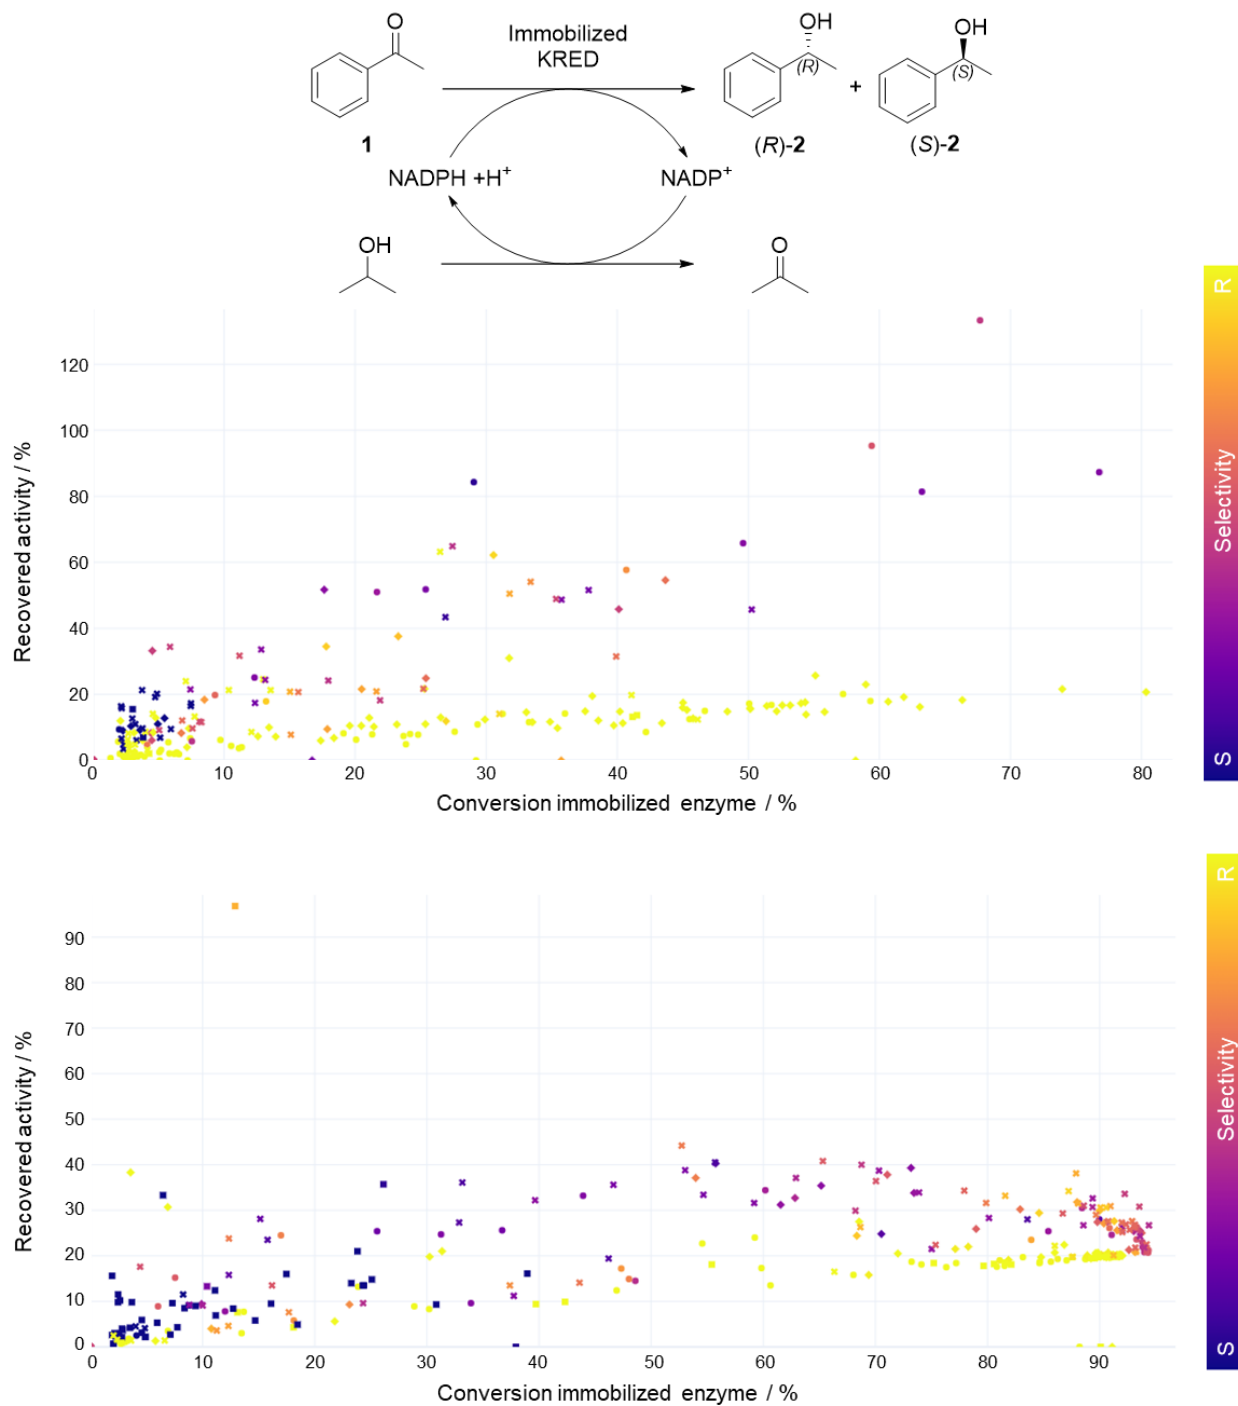

Figure S4: Selectivity, recovered activity and conversion of screened Ketoreductases for the reduction of acetophenone (1) to phenylethanol (S)-2 and (R)-2. For the cofactor regeneration of NADPH isopropanol was used as co-substrate. The screening was conducted in a 96 well plate with 4 vol% (top) and 40 vol% (bottom) lysate concentration. Recovered activity was calculated by comparison of product-related conversion of immobilized enzyme vs. free enzyme and does not take immobilization efficiency into account. The colour represents the enantioselectivity of the enzyme (R = yellow, S = blue).



Table S6: Summary of the commercially available enzyme from the Codexis panels including the variant chosen for scale-up (**bold**); Recovered activity and conversion of immobilized ADH candidates for the enantioselective reduction of acetophenone (**1**). Recovered activity is calculated by comparison of product-related conversion of immobilized enzyme vs. free enzyme and does not take immobilization efficiency into account.

| Plate               | Well       | Synonym                                  | 4 vol% Lysate  |            |                        | 40 vol% Lysate |            |                        |
|---------------------|------------|------------------------------------------|----------------|------------|------------------------|----------------|------------|------------------------|
|                     |            |                                          | conversion / % | ee / %     | Recovered activity / % | conversion / % | ee / %     | Recovered activity / % |
| KRED plate 1        | E05        | Wildtype <i>Lactobacillus kefir</i> KRED | 29             | 100        | -                      | 91             | 100        | 20                     |
| KRED plate 1        | E06        |                                          | 36             | 100        | 14                     | 91             | 100        | 20                     |
| KRED plate 1        | E07        |                                          | 21             | 100        | 8                      | 90             | 100        | 20                     |
| KRED plate 1        | E08        |                                          | 25             | 100        | 8                      | 90             | 100        | 20                     |
| KRED plate 3        | E07        |                                          | 41             | 100        | 13                     | 89             | 100        | 20                     |
| KRED plate 3        | E08        |                                          | 41             | 100        | 14                     | 90             | 100        | -                      |
| KRED plate 1        | E09        | KRED parent 2                            | 57             | 100        | 20                     | 91             | 100        | 20                     |
| KRED plate 1        | E10        |                                          | 47             | 100        | 15                     | 90             | 100        | 20                     |
| KRED plate 1        | E11        |                                          | 52             | 100        | 17                     | 90             | 100        | 20                     |
| KRED plate 1        | E12        |                                          | 29             | 100        | 11                     | 90             | 100        | 20                     |
| KRED plate 2        | E03        |                                          | 50             | 100        | 16                     | 90             | 100        | 20                     |
| KRED plate 2        | E04        |                                          | 53             | 100        | 17                     | 92             | 100        | 20                     |
| KRED plate 2        | E05        | 53                                       | 100            | 17         | 92                     | 100            | 20         |                        |
| KRED plate 2        | E06        | 54                                       | 100            | 18         | 91                     | 100            | 20         |                        |
| KRED plate 3        | E01        | KRED plate 3 parent 1                    | 0              | -          | -                      | 2              | -100       | -                      |
| KRED plate 3        | E02        |                                          | 0              | -          | -                      | 2              | -100       | 16                     |
| KRED plate 3        | E03        |                                          | 0              | -          | -                      | 2              | -100       | 10                     |
| KRED plate 3        | E04        |                                          | 0              | -          | -                      | 3              | -100       | 10                     |
| KRED plate 3        | E09        | KRED plate 3 parent 2                    | 0              | -          | 0                      | 25             | -100       | 15                     |
| KRED plate 3        | E10        |                                          | 0              | -          | 0                      | 24             | -100       | 14                     |
| KRED plate 3        | E11        |                                          | 0              | -          | 0                      | 23             | -100       | 14                     |
| KRED plate 3        | E12        |                                          | 0              | -          | 0                      | 24             | -100       | 14                     |
| KRED plate 1        | A04        | KRED-P1A04                               | 42             | 100        | 9                      | 91             | 100        | 20                     |
| KRED plate 1        | A12        | KRED-P1A12                               | 6              | 100        | 6                      | 83             | 100        | 20                     |
| KRED plate 1        | B02        | KRED-P1B02                               | 59             | 9          | 95                     | 93             | 10         | 24                     |
| KRED plate 4        | D03        |                                          | 35             | 1          | 49                     | 93             | 10         | 26                     |
| KRED plate 1        | B05        | KRED-P1B05                               | 0              | -          | 0                      | 26             | -57        | 25                     |
| KRED plate 4        | F03        |                                          | 0              | -          | -                      | 15             | -62        | 28                     |
| KRED plate 1        | B10        | KRED-P1B10                               | 4              | 33         | 5                      | 94             | 12         | 21                     |
| KRED plate 4        | H03        |                                          | 3              | 100        | 5                      | 90             | 36         | 29                     |
| KRED plate 1        | B12        | KRED-P1B12                               | 13             | 80         | 18                     | 84             | 61         | 24                     |
| KRED plate 4        | A04        |                                          | 10             | 100        | 21                     | 88             | 63         | 32                     |
| KRED plate 1        | C01        | KRED-P1C01                               | 0              | -          | 0                      | 49             | -16        | 15                     |
| KRED plate 4        | B04        |                                          | 0              | -          | 0                      | 24             | -17        | 10                     |
| KRED plate 1        | H08        | KRED-P1H08                               | 29             | -87        | 84                     | 90             | -66        | 28                     |
| KRED plate 4        | F07        |                                          | 7              | -100       | 17                     | 84             | -73        | 28                     |
| KRED plate 2        | A03        | KRED-P2A03                               | 4              | 7          | 6                      | 94             | 21         | 25                     |
| KRED plate 4        | E03        |                                          | 8              | 13         | 10                     | 93             | 23         | 26                     |
| KRED plate 4        | E04        |                                          | 8              | 9          | 12                     | 92             | 22         | 25                     |
| KRED plate 4        | E05        |                                          | 8              | 5          | 12                     | 93             | 22         | 26                     |
| KRED plate 4        | E06        |                                          | 3              | 100        | 4                      | 92             | 21         | 27                     |
| KRED plate 2        | B02        |                                          | 5              | -100       | 13                     | 73             | -36        | 34                     |
| KRED plate 4        | C09        | KRED-P2B02                               | 7              | -100       | 17                     | 74             | -36        | 34                     |
| KRED plate 2        | C01        | KRED-P2C01                               | 21             | 100        | 10                     | 89             | 97         | 20                     |
| KRED plate 2        | C02        | KRED-P2C02                               | 4              | -100       | 9                      | 62             | -38        | 31                     |
| KRED plate 4        | B10        |                                          | 5              | -100       | 20                     | 70             | -36        | 39                     |
| KRED plate 2        | C11        | KRED-P2C11                               | 3              | 100        | 5                      | 83             | 32         | 30                     |
| KRED plate 4        | E10        |                                          | 4              | 100        | 9                      | 80             | 36         | 32                     |
| KRED plate 2        | D03        | KRED-P2D03                               | 0              | -          | 0                      | 79             | 18         | 26                     |
| KRED plate 4        | H10        |                                          | 3              | 100        | 5                      | 75             | 17         | 22                     |
| KRED plate 2        | D11        | KRED-P2D11                               | 5              | -100       | 11                     | 71             | -69        | 25                     |
| KRED plate 4        | D11        |                                          | 7              | -43        | 22                     | 46             | -72        | 19                     |
| KRED plate 2        | D12        | KRED-P2D12                               | 0              | -          | -                      | 23             | 45         | 9                      |
| KRED plate 4        | E11        |                                          | 3              | 100        | 6                      | 18             | 45         | 8                      |
| <b>KRED plate 2</b> | <b>F01</b> | <b>KRED-P2F01 (scale-up)</b>             | <b>74</b>      | <b>100</b> | <b>22</b>              | <b>91</b>      | <b>100</b> | <b>20</b>              |

|              |     |            |    |      |    |    |      |    |
|--------------|-----|------------|----|------|----|----|------|----|
| KRED plate 2 | F12 | KRED-P2F12 | 30 | 100  | 12 | 92 | 100  | 20 |
| KRED plate 2 | G03 | KRED-P2G03 | 27 | 100  | 13 | 92 | 97   | 20 |
| KRED plate 2 | H07 | KRED-P2H07 | 34 | 100  | 12 | 90 | 100  | 20 |
| KRED plate 2 | H08 | KRED-P2H08 | 33 | 100  | 15 | 91 | 100  | 20 |
| KRED plate 3 | B03 | KRED-P3B03 | 0  | -    | 0  | 5  | -100 | 2  |
| KRED plate 3 | G09 | KRED-P3G09 | 0  | -    | -  | 0  | -    | 0  |
| KRED plate 3 | H02 | KRED-P3H02 | 0  | -    | -  | 3  | -100 | 4  |
| KRED plate 3 | H12 | KRED-P3H12 | 3  | -100 | 16 | 39 | -100 | 16 |

Table S7: Summary of all screened enzymes from Codexis panels; Recovered activity and conversion of immobilized ADH candidates for the enantioselective reduction of acetophenone (1). Recovered activity is calculated by comparison of product-related conversion of immobilized enzyme vs. free enzyme and does not take immobilization efficiency into account.

| Plate        | Well          | Synonym     | 4 vol% Lysate  |        |                        | 40 vol% Lysate |        |                        |
|--------------|---------------|-------------|----------------|--------|------------------------|----------------|--------|------------------------|
|              |               |             | conversion / % | ee / % | Recovered activity / % | conversion / % | ee / % | Recovered activity / % |
| KRED Plate 1 | A01           |             | 59             | 100    | 18                     | 91             | 100    | 20                     |
|              | A02           |             | 24             | 100    | 5                      | 91             | 100    | 20                     |
|              | A03           |             | 3              | 100    | 1                      | 85             | 100    | 18                     |
|              | A04           | KRED-P1A04  | 42             | 100    | 9                      | 91             | 100    | 20                     |
|              | A05           |             | 50             | 100    | 17                     | 91             | 100    | 20                     |
|              | A06           |             | 33             | 100    | 12                     | 91             | 100    | 20                     |
|              | A07           |             | 2              | 100    | 1                      | 82             | 100    | 18                     |
|              | A08           |             | 11             | 100    | 4                      | 91             | 100    | 20                     |
|              | A09           |             | 2              | 100    | 2                      | 47             | 100    | 12                     |
|              | A10           |             | 0              | -      | 0                      | 73             | 100    | 19                     |
|              | A11           |             | 1              | 100    | 1                      | 85             | 100    | 19                     |
|              | A12           | KRED-P1-A12 | 6              | 100    | 6                      | 83             | 100    | 20                     |
|              | B01           |             | 0              | -      | -                      | 0              | -      | 0                      |
|              | B02           | KRED-P1B02  | 59             | 9      | 95                     | 93             | 10     | 24                     |
|              | B03           |             | 19             | 100    | 8                      | 89             | 100    | 20                     |
|              | B04           |             | 7              | 100    | 7                      | 76             | 100    | 18                     |
|              | B05           | KRED-P1B05  | 0              | -      | 0                      | 26             | -57    | 25                     |
|              | B06           |             | 0              | -      | -                      | 12             | -39    | 8                      |
|              | B07           |             | 4              | 100    | 2                      | 91             | 100    | 20                     |
|              | B08           |             | 0              | -      | 0                      | 77             | 100    | 18                     |
|              | B09           |             | 0              | -      | 0                      | 24             | 100    | 13                     |
|              | B10           | KRED-P1B10  | 4              | 33     | 5                      | 94             | 12     | 21                     |
|              | B11           |             | 6              | 100    | 2                      | 86             | 97     | 19                     |
|              | B12           | KRED-P1B12  | 13             | 80     | 18                     | 84             | 61     | 24                     |
|              | C01           | KRED-P1C01  | 0              | -      | 0                      | 49             | -16    | 15                     |
|              | C02           |             | 0              | -      | -                      | 0              | -      | 0                      |
|              | C03           |             | 0              | -      | 0                      | 14             | 100    | 8                      |
|              | C04           |             | 0              | -      | 0                      | 47             | 51     | 17                     |
|              | C05           |             | 0              | -      | -                      | 0              | -      | 0                      |
|              | C06           |             | 2              | -100   | 9                      | 60             | -27    | 34                     |
|              | C07           |             | 2              | 100    | 6                      | 55             | 100    | 23                     |
|              | C08           |             | 0              | -      | 0                      | 0              | -      | 0                      |
|              | C09           |             | 77             | -46    | 87                     | 94             | -11    | 21                     |
|              | C10           |             | 0              | -      | 0                      | 61             | 100    | 14                     |
|              | C11           |             | 0              | -      | -                      | 3              | 100    | 1                      |
|              | C12           |             | 3              | 100    | 2                      | 86             | 97     | 19                     |
|              | D01           |             | 5              | 100    | 3                      | 89             | 100    | 19                     |
|              | D02           |             | 3              | 100    | 3                      | 68             | 100    | 16                     |
|              | D03           |             | 10             | 100    | 6                      | 81             | 97     | 19                     |
|              | D04           |             | 0              | -      | -                      | 31             | -47    | 25                     |
|              | D05           |             | 50             | -44    | 66                     | 91             | -24    | 25                     |
|              | D06           |             | 0              | -      | -                      | 6              | 15     | 9                      |
|              | D07           |             | 0              | -      | -                      | 8              | 14     | 15                     |
|              | D08           |             | 5              | 100    | 3                      | 60             | 100    | 17                     |
|              | D09           |             | 2              | 100    | 1                      | 74             | 100    | 18                     |
|              | D10           |             | 20             | 100    | 6                      | 89             | 100    | 20                     |
|              | D11           |             | 0              | -      | 0                      | 7              | 100    | 4                      |
| D12          |               | 3           | 100            | 1      | 88                     | 100            | v      |                        |
| E01          | Neg Control   | 0           | -              | -      | 0                      | -              | -      |                        |
| E02          | Neg Control   | 0           | -              | -      | 0                      | -              | -      |                        |
| E03          | Neg Control   | 0           | -              | -      | 0                      | -              | -      |                        |
| E04          | Neg Control   | 0           | -              | -      | 0                      | -              | -      |                        |
| E05          | KRED parent 1 | 29          | 100            | -      | 91                     | 100            | 20     |                        |
| E06          | KRED parent 1 | 36          | 100            | 14     | 91                     | 100            | 20     |                        |
| E07          | KRED parent 1 | 21          | 100            | 8      | 90                     | 100            | 20     |                        |

|              |     |               |    |      |     |    |      |    |
|--------------|-----|---------------|----|------|-----|----|------|----|
|              | E08 | KRED parent 1 | 25 | 100  | 8   | 90 | 100  | 20 |
|              | E09 | KRED parent 2 | 57 | 100  | 20  | 91 | 100  | 20 |
|              | E10 | KRED parent 2 | 47 | 100  | 15  | 90 | 100  | 20 |
|              | E11 | KRED parent 2 | 52 | 100  | 17  | 90 | 100  | 20 |
|              | E12 | KRED parent 2 | 29 | 100  | 11  | 90 | 100  | 20 |
|              | F01 |               | 3  | 100  | 1   | 89 | 100  | 19 |
|              | F02 |               | 11 | 100  | 4   | 91 | 100  | 20 |
|              | F03 |               | 6  | 100  | 2   | 90 | 100  | 20 |
|              | F04 |               | 7  | 100  | 2   | 91 | 100  | 20 |
|              | F05 |               | 7  | 100  | -   | 90 | 98   | 20 |
|              | F06 |               | 11 | 100  | 4   | 91 | 100  | 20 |
|              | F07 |               | 6  | 100  | 2   | 81 | 100  | 18 |
|              | F08 |               | 0  | -    | 0   | 30 | 100  | 8  |
|              | F09 |               | 0  | -    | 0   | 29 | 100  | 9  |
|              | F10 |               | 31 | 100  | 14  | 90 | 100  | 20 |
|              | F11 |               | 46 | 100  | 13  | 91 | 100  | 20 |
|              | F12 |               | 5  | 100  | -   | 90 | 100  | 20 |
|              | G01 |               | 63 | -50  | 81  | 94 | -16  | 22 |
|              | G02 |               | 24 | 100  | 7   | 90 | 100  | 20 |
|              | G03 |               | 0  | -    | 0   | 2  | 100  | 3  |
|              | G04 |               | 28 | 100  | 9   | 91 | 100  | 20 |
|              | G05 |               | 0  | -    | 0   | 44 | -47  | 33 |
|              | G06 |               | 4  | 100  | 1   | 87 | 100  | 19 |
|              | G07 |               | 0  | -    | -   | 17 | 39   | 25 |
|              | G08 |               | 68 | -9   | 133 | 94 | -3   | 23 |
|              | G09 |               | 24 | 100  | 8   | 90 | 100  | 20 |
|              | G10 |               | 0  | -    | -   | 3  | 100  | 1  |
|              | G11 |               | 9  | 22   | 20  | 48 | 39   | 15 |
|              | G12 |               | 22 | -33  | 51  | 88 | -20  | 31 |
|              | H01 |               | 0  | -    | 0   | 4  | -100 | 3  |
|              | H02 |               | 0  | -    | 0   | 18 | 49   | 6  |
|              | H03 |               | 0  | -    | 0   | 13 | 100  | 3  |
|              | H04 |               | 0  | -    | 0   | 3  | 100  | 2  |
|              | H05 |               | 0  | -    | 0   | 34 | -44  | 10 |
|              | H06 |               | 12 | -47  | 25  | 85 | -34  | 25 |
|              | H07 |               | 25 | -50  | 52  | 91 | -26  | 27 |
|              | H08 | KRED-P1H08    | 29 | -87  | 84  | 90 | -66  | 28 |
|              | H09 |               | 0  | -    | 0   | 37 | -54  | 26 |
|              | H10 |               | 41 | 47   | 58  | 91 | 27   | 26 |
|              | H11 |               | 8  | -13  | 6   | 94 | 11   | 21 |
|              | H12 |               | 0  | -    | 0   | 59 | 100  | 24 |
| KRED Plate 2 | A01 |               | 0  | -    | 0   | 6  | 100  | 1  |
|              | A02 |               | 23 | 73   | 38  | 92 | 52   | 26 |
|              | A03 | KRED-P2-A03   | 4  | 7    | 6   | 94 | 21   | 25 |
|              | A04 |               | 40 | 100  | 11  | 92 | 100  | 20 |
|              | A05 |               | 4  | 2    | 8   | 90 | 16   | 27 |
|              | A06 |               | 18 | 79   | 35  | 91 | 79   | 28 |
|              | A07 |               | 5  | 100  | 13  | 88 | 61   | 32 |
|              | A08 |               | 0  | -    | 0   | 4  | 100  | 38 |
|              | A09 |               | 0  | -    | 0   | 11 | 66   | 4  |
|              | A10 |               | 3  | 100  | 3   | 69 | 95   | 16 |
|              | A11 |               | 38 | 100  | 20  | 87 | 100  | 22 |
|              | A12 |               | 32 | 100  | 31  | 92 | 100  | 20 |
|              | B01 |               | 23 | 100  | 11  | 91 | 96   | 21 |
|              | B02 | KRED-P2B02    | 5  | -100 | 13  | 73 | -36  | 34 |
|              | B03 |               | 27 | 85   | 12  | 90 | 88   | 20 |
|              | B04 |               | 3  | -100 | 10  | 73 | -43  | 39 |
|              | B05 |               | 5  | -4   | 33  | 71 | 14   | 38 |
|              | B06 |               | 4  | 100  | 6   | 77 | 94   | 22 |
|              | B07 |               | 0  | -    | -   | 10 | -32  | 9  |
|              | B08 |               | 25 | 100  | 11  | 90 | 100  | 20 |
| B09          |     | 20            | 60 | 22   | 68  | 77 | 24   |    |

|     |               |    |      |    |    |     |    |
|-----|---------------|----|------|----|----|-----|----|
| B10 |               | 7  | 100  | 10 | 78 | 94  | 22 |
| B11 |               | 0  | -    | -  | 7  | 100 | 31 |
| B12 |               | 48 | 100  | 15 | 91 | 100 | 20 |
| C01 | KRED-P2C01    | 21 | 100  | 10 | 89 | 97  | 20 |
| C02 | KRED-P2C02    | 4  | -100 | 9  | 62 | -38 | 31 |
| C03 |               | 2  | -100 | 9  | 65 | -42 | 35 |
| C04 |               | 0  | -    | 0  | 56 | -72 | 40 |
| C05 |               | 17 | 100  | 6  | 89 | 100 | 19 |
| C06 |               | 43 | 100  | 11 | 92 | 100 | 20 |
| C07 |               | 66 | 100  | 18 | 92 | 100 | 20 |
| C08 |               | 35 | 100  | 10 | 91 | 100 | 20 |
| C09 |               | 46 | 100  | 13 | 92 | 100 | 20 |
| C10 |               | 54 | 100  | 14 | 91 | 100 | 20 |
| C11 | KRED-P2C11    | 3  | 100  | 5  | 83 | 32  | 30 |
| C12 |               | 7  | 37   | 8  | 93 | 21  | 26 |
| D01 |               | 45 | 100  | 18 | 90 | 100 | 20 |
| D02 |               | 18 | -43  | 52 | 63 | -22 | 33 |
| D03 | KRED-P2D03    | 0  | -    | 0  | 79 | 18  | 26 |
| D04 |               | 8  | 54   | 18 | 90 | 54  | 27 |
| D05 |               | 0  | -    | 0  | 54 | 37  | 37 |
| D06 |               | 0  | -    | 0  | 2  | 100 | 1  |
| D07 |               | 21 | 100  | 13 | 72 | 100 | 21 |
| D08 |               | 20 | 100  | 11 | 86 | 100 | 21 |
| D09 |               | 52 | 100  | 15 | 91 | 100 | 20 |
| D10 |               | 55 | 100  | 26 | 90 | 100 | 21 |
| D11 | KRED-P2D11    | 5  | -100 | 11 | 71 | -69 | 25 |
| D12 | KRED-P2D12    | 0  | -    | -  | 23 | 45  | 9  |
| E01 | Neg Control   | 0  | -    | -  | 0  | -   | -  |
| E02 | Neg Control   | 0  | -    | -  | 0  | -   | -  |
| E03 | KRED parent 2 | 50 | 100  | 16 | 90 | 100 | 20 |
| E04 | KRED parent 2 | 53 | 100  | 17 | 92 | 100 | 20 |
| E05 | KRED parent 2 | 53 | 100  | 17 | 92 | 100 | 20 |
| E06 | KRED parent 2 | 54 | 100  | 18 | 91 | 100 | 20 |
| E07 |               | 2  | 100  | 12 | 30 | 100 | 20 |
| E08 |               | 3  | 100  | 8  | 69 | 100 | 28 |
| E09 |               | 0  | -    | 0  | 31 | 100 | 21 |
| E10 |               | 17 | -52  | -  | 93 | -20 | 25 |
| E11 |               | 3  | 100  | -  | 0  | -   | 0  |
| E12 |               | 5  | 100  | 9  | 90 | 71  | 30 |
| F01 | KRED P02 F01  | 74 | 100  | 22 | 91 | 100 | 20 |
| F02 |               | 36 | 60   | -  | 93 | 32  | 26 |
| F03 |               | 40 | -2   | 46 | 94 | 0   | 26 |
| F04 |               | 20 | 100  | 11 | 92 | 100 | 20 |
| F05 |               | 13 | 100  | 10 | 89 | 96  | 20 |
| F06 |               | 45 | 100  | 16 | 91 | 100 | 20 |
| F07 |               | 56 | 100  | 15 | 91 | 100 | 20 |
| F08 |               | 80 | 100  | 21 | 90 | 100 | 20 |
| F09 |               | 40 | 100  | 11 | 91 | 100 | 20 |
| F10 |               | 45 | 100  | 15 | 91 | 100 | 20 |
| F11 |               | 25 | 27   | 25 | 94 | 20  | 22 |
| F12 | KRED-P2F12    | 30 | 100  | 12 | 92 | 100 | 20 |
| G01 |               | 13 | 100  | 7  | 90 | 100 | 21 |
| G02 |               | 18 | 59   | 10 | 93 | 63  | 21 |
| G03 | KRED-P2-G03   | 27 | 100  | 13 | 92 | 97  | 20 |
| G04 |               | 44 | 29   | 55 | 93 | 21  | 21 |
| G05 |               | 35 | 100  | 12 | 91 | 100 | 20 |
| G06 |               | 14 | 100  | 7  | 85 | 100 | 20 |
| G07 |               | 40 | 100  | 15 | 91 | 100 | -  |
| G08 |               | 62 | 100  | 19 | 91 | 100 | 20 |
| G09 |               | 63 | 100  | 16 | 91 | 100 | 20 |
| G10 |               | 61 | 100  | 18 | 92 | 100 | 20 |
| G11 |               | 50 | 100  | 16 | 91 | 100 | 20 |
| G12 |               | 58 | 100  | -  | 92 | 100 | 20 |

|              |                       |            |    |     |    |      |      |    |
|--------------|-----------------------|------------|----|-----|----|------|------|----|
|              | H01                   |            | 59 | 100 | 23 | 92   | 98   | 20 |
|              | H02                   |            | 25 | 100 | 22 | 91   | 100  | 20 |
|              | H03                   |            | 31 | 85  | 62 | 85   | 83   | 29 |
|              | H04                   |            | 0  | -   | 0  | 22   | 100  | 6  |
|              | H05                   |            | 54 | 100 | 17 | 92   | 100  | 20 |
|              | H06                   |            | 39 | 100 | 12 | 92   | 100  | 20 |
|              | H07                   | KRED-P2H07 | 34 | 100 | 12 | 90   | 100  | 20 |
|              | H08                   | KRED-P2H08 | 33 | 100 | 15 | 91   | 100  | 20 |
|              | H09                   |            | 51 | 100 | 17 | 91   | 100  | 20 |
|              | H10                   |            | 38 | 100 | 15 | 91   | 100  | 20 |
|              | H11                   |            | 18 | 100 | 7  | 91   | 100  | 20 |
|              | H12                   |            | 7  | 100 | 4  | 82   | 96   | 19 |
| KRED Plate 3 | A01                   |            | 0  | -   | -  | 0    | -    | -  |
|              | A02                   |            | 0  | -   | -  | 6    | -100 | 33 |
|              | A03                   |            | 0  | -   | 0  | 5    | -100 | 2  |
|              | A04                   |            | 0  | -   | -  | 0    | -    | 0  |
|              | A05                   |            | 0  | -   | -  | 0    | -    | 0  |
|              | A06                   |            | 0  | -   | -  | 0    | -    | 0  |
|              | A07                   |            | 0  | -   | 0  | 2    | -100 | 2  |
|              | A08                   |            | 0  | -   | 0  | 81   | 100  | 18 |
|              | A09                   |            | 0  | -   | 0  | 26   | -87  | 36 |
|              | A10                   |            | 0  | -   | 0  | 0    | -    | 0  |
|              | A11                   |            | 0  | -   | 0  | 18   | 100  | 4  |
|              | A12                   |            | 0  | -   | 0  | 9    | -100 | 9  |
|              | B01                   |            | 0  | -   | -  | 7    | -100 | 10 |
|              | B02                   |            | 0  | -   | -  | 0    | -    | 0  |
|              | B03                   | KRED-P3B03 | 0  | -   | 0  | 5    | -100 | 2  |
|              | B04                   |            | 0  | -   | -  | 0    | -    | 0  |
|              | B05                   |            | 0  | -   | -  | 0    | -    | 0  |
|              | B06                   |            | 0  | -   | -  | 0    | -    | 0  |
|              | B07                   |            | 0  | -   | -  | 0    | -    | 0  |
|              | B08                   |            | 0  | -   | 0  | 82   | 100  | 18 |
|              | B09                   |            | 0  | -   | -  | 10   | -50  | 13 |
|              | B10                   |            | 0  | -   | 0  | 80   | 100  | 18 |
|              | B11                   |            | 0  | -   | -  | 0    | -    | 0  |
|              | B12                   |            | 0  | -   | 0  | 13   | 64   | 97 |
|              | C01                   |            | 0  | -   | -  | 11   | -100 | 12 |
|              | C02                   |            | 0  | -   | -  | 3    | -100 | 4  |
|              | C03                   |            | 0  | -   | 0  | 18   | -100 | 5  |
|              | C04                   |            | 0  | -   | -  | 0    | -    | 0  |
|              | C05                   |            | 0  | -   | -  | 0    | -    | 0  |
|              | C06                   |            | 0  | -   | 0  | 0    | -    | 0  |
|              | C07                   |            | 0  | -   | -  | 0    | -    | -  |
|              | C08                   |            | 0  | -   | 0  | 5    | -100 | 3  |
|              | C09                   |            | 0  | -   | 0  | 16   | -100 | 10 |
|              | C10                   |            | 0  | -   | -  | 0    | -    | -  |
|              | C11                   |            | 2  | 100 | 1  | 82   | 100  | 19 |
|              | C12                   |            | 0  | -   | 0  | 2    | -100 | 1  |
| D01          |                       | 0          | -  | -   | 4  | -100 | 4    |    |
| D02          |                       | 0          | -  | 0   | 6  | -100 | 5    |    |
| D03          |                       | 0          | -  | 0   | 5  | -100 | 6    |    |
| D04          |                       | 0          | -  | -   | 0  | -    | 0    |    |
| D05          |                       | 0          | -  | -   | 0  | -    | 0    |    |
| D06          |                       | 0          | -  | 0   | 8  | -100 | 4    |    |
| D07          |                       | 0          | -  | 0   | 40 | 100  | 9    |    |
| D08          |                       | 0          | -  | -   | 0  | -    | 0    |    |
| D09          |                       | 0          | -  | -   | 0  | -    | -    |    |
| D10          |                       | 0          | -  | 0   | 0  | -    | 0    |    |
| D11          |                       | 0          | -  | -   | 0  | -    | 0    |    |
| D12          |                       | 0          | -  | -   | 2  | -100 | 3    |    |
| E01          | KRED plate 3 parent 1 | 0          | -  | -   | 2  | -100 | -    |    |
| E02          | KRED plate 3 parent 1 | 0          | -  | -   | 2  | -100 | 16   |    |

|              |            |                       |     |      |    |     |      |    |
|--------------|------------|-----------------------|-----|------|----|-----|------|----|
|              | E03        | KRED plate 3 parent 1 | 0   | -    | -  | 2   | -100 | 10 |
|              | E04        | KRED plate 3 parent 1 | 0   | -    | -  | 3   | -100 | 10 |
|              | E05        | Neg Control           | 0   | -    | -  | 0   | -    | -  |
|              | E06        | Neg Control           | 0   | -    | -  | 0   | -    | -  |
|              | E07        | KRED parent 1         | 41  | 100  | 13 | 89  | 100  | 20 |
|              | E08        | KRED parent 1         | 41  | 100  | 14 | 90  | 100  | -  |
|              | E09        | KRED plate 3 parent 2 | 0   | -    | 0  | 25  | -100 | 15 |
|              | E10        | KRED plate 3 parent 2 | 0   | -    | 0  | 24  | -100 | 14 |
|              | E11        | KRED plate 3 parent 2 | 0   | -    | 0  | 23  | -100 | 14 |
|              | E12        | KRED plate 3 parent 2 | 0   | -    | 0  | 24  | -100 | 14 |
|              | F01        |                       | 0   | -    | -  | 9   | -100 | 9  |
|              | F02        |                       | 0   | -    | -  | 2   | -100 | 3  |
|              | F03        |                       | 0   | -    | 0  | 24  | -100 | 21 |
|              | F04        |                       | 0   | -    | 0  | 0   | -    | -  |
|              | F05        |                       | 0   | -    | -  | 0   | -    | 0  |
|              | F06        |                       | 0   | -    | -  | 0   | -    | 0  |
|              | F07        |                       | 3   | 100  | 2  | 55  | 100  | 18 |
|              | F08        |                       | 0   | -    | 0  | 38  | -91  | -  |
|              | F09        |                       | 4   | 100  | 2  | 75  | 100  | 18 |
|              | F10        |                       | 0   | -    | 0  | 13  | 100  | 8  |
|              | F11        |                       | 0   | -    | -  | 0   | -    | 0  |
|              | F12        |                       | 0   | -    | 0  | 15  | -100 | 6  |
|              | G01        |                       | 0   | -    | -  | 2   | -100 | 12 |
|              | G02        |                       | 0   | -    | 0  | 8   | -100 | 9  |
|              | G03        |                       | 0   | -    | 0  | 17  | -100 | 16 |
|              | G04        |                       | 0   | -    | 0  | 7   | -100 | 3  |
|              | G05        |                       | 0   | -    | 0  | 3   | -100 | 2  |
|              | G06        |                       | 0   | -    | -  | 0   | -    | 0  |
|              | G07        |                       | 0   | -    | 0  | 88  | 98   | 20 |
|              | G08        |                       | 0   | -    | -  | 0   | -    | 0  |
|              | G09        | KRED-P3G09            | 0   | -    | -  | 0   | -    | 0  |
|              | G10        |                       | 0   | -    | -  | 0   | -    | -  |
|              | G11        |                       | 0   | -    | 0  | 0   | -    | 0  |
|              | G12        |                       | 4   | -100 | 7  | 31  | -100 | 9  |
|              | H01        |                       | 0   | -    | -  | 13  | -100 | 8  |
|              | H02        | KRED P03 H02          | 0   | -    | -  | 3   | -100 | 4  |
|              | H03        |                       | 0   | -    | -  | 0   | -    | 0  |
|              | H04        |                       | 0   | -    | 0  | 0   | -    | 0  |
|              | H05        |                       | 0   | -    | -  | 2   | -100 | 3  |
|              | H06        |                       | 0   | -    | -  | 0   | -    | 0  |
|              | H07        |                       | 0   | -    | 0  | 3   | 100  | 1  |
|              | H08        |                       | 0   | -    | 0  | 11  | -100 | 7  |
|              | H09        |                       | 0   | -    | -  | 4   | -100 | 10 |
|              | H10        |                       | 0   | -    | 0  | 42  | 100  | 10 |
|              | H11        |                       | 0   | -    | -  | 0   | -    | 0  |
|              | H12        | KRED-P3H12            | 3   | -100 | 16 | 39  | -100 | 16 |
| KRED Plate 4 | A01        |                       | 5   | 1    | 9  | 89  | 5    | 31 |
|              | A02        |                       | 7   | 26   | 12 | 91  | 32   | 28 |
|              | A03        |                       | 2   | -100 | 16 | 33  | -69  | 27 |
|              | A04        | KRED-P1B12            | 10  | 100  | 21 | 88  | 63   | 32 |
|              | A05        |                       | 0   | -    | 0  | 4   | -100 | 5  |
|              | A06        |                       | 0   | -    | -  | 12  | 36   | 24 |
|              | A07        |                       | 0   | -    | 0  | 7   | 100  | 1  |
|              | A08        |                       | 22  | -6   | 18 | 94  | 10   | 21 |
|              | A09        |                       | 4   | 100  | 3  | 66  | 100  | 17 |
|              | A10        |                       | 0   | -    | -  | 0   | -    | 0  |
|              | A11        |                       | 15  | 65   | 21 | 91  | 55   | 31 |
|              | A12        |                       | 32  | 62   | 51 | 93  | 35   | 28 |
|              | B01        |                       | 3   | -100 | 11 | 59  | -46  | 32 |
|              | B02        |                       | 0   | -    | 0  | 80  | -40  | 28 |
| B03          |            | 27                    | -83 | 43   | 92 | -43 | 26   |    |
| B04          | KRED-P1C01 | 0                     | -   | 0    | 24 | -17 | 10   |    |

|     |             |    |      |    |    |      |    |
|-----|-------------|----|------|----|----|------|----|
| B05 |             | 36 | -48  | 49 | 92 | -28  | 26 |
| B06 |             | 27 | -14  | 65 | 92 | -5   | 34 |
| B07 |             | 0  | -    | 0  | 2  | 100  | 2  |
| B08 |             | 14 | 100  | 21 | 92 | 57   | 26 |
| B09 |             | 41 | 100  | 20 | 86 | 97   | 22 |
| B10 | KRED-P2C02  | 5  | -100 | 20 | 70 | -36  | 39 |
| B11 |             | 0  | -    | 0  | 53 | 35   | 44 |
| B12 |             | 18 | -13  | 24 | 94 | 1    | 31 |
| C01 |             | 12 | 100  | 9  | 91 | 71   | 20 |
| C02 |             | 5  | -100 | 7  | 68 | -9   | 30 |
| C03 |             | 0  | -    | -  | 0  | -    | 0  |
| C04 |             | 0  | -    | -  | 0  | -    | 0  |
| C05 |             | 0  | -    | -  | 0  | -    | 0  |
| C06 |             | 0  | -    | 0  | 4  | 100  | 1  |
| C07 |             | 0  | -    | 0  | 38 | -44  | 11 |
| C08 |             | 46 | 100  | 12 | 91 | 100  | 20 |
| C09 | KRED-P2B02  | 7  | -100 | 17 | 74 | -36  | 34 |
| C10 |             | 3  | -100 | 13 | 55 | -51  | 33 |
| C11 |             | 0  | -    | 0  | 0  | -    | 0  |
| C12 |             | 25 | 23   | 22 | 94 | 21   | 23 |
| D01 |             | 11 | 9    | 32 | 78 | 21   | 34 |
| D02 |             | 5  | 100  | 14 | 82 | 69   | 33 |
| D03 | KRED-P1B02  | 35 | 1    | 49 | 93 | 10   | 26 |
| D04 |             | 0  | -    | 0  | 37 | 47   | 14 |
| D05 |             | 0  | -    | -  | 0  | -    | 0  |
| D06 |             | 0  | -    | 0  | 44 | 32   | 14 |
| D07 |             | 2  | -100 | 4  | 75 | -39  | 22 |
| D08 |             | 2  | -100 | 5  | 87 | 16   | 29 |
| D09 |             | 31 | 86   | 14 | 88 | 87   | 20 |
| D10 |             | 2  | -100 | 16 | 33 | -73  | 36 |
| D11 | KRED-P2D11  | 7  | -43  | 22 | 46 | -72  | 19 |
| D12 |             | 15 | 51   | 8  | 93 | 61   | 21 |
| E01 | Neg Control | 0  | -    | -  | 0  | -    | -  |
| E02 | Neg Control | 0  | -    | -  | 0  | -    | -  |
| E03 | KRED-P2-A03 | 8  | 13   | 10 | 93 | 23   | 26 |
| E04 | KRED-P2-A03 | 8  | 9    | 12 | 92 | 22   | 25 |
| E05 | KRED-P2-A03 | 8  | 5    | 12 | 93 | 22   | 26 |
| E06 | KRED-P2-A03 | 3  | 100  | 4  | 92 | 21   | 27 |
| E07 |             | 6  | -100 | 10 | 89 | -30  | 27 |
| E08 |             | 13 | 100  | 25 | 91 | 80   | 31 |
| E09 |             | 4  | -100 | 21 | 56 | -74  | 41 |
| E10 | KRED-P2C11  | 4  | 100  | 9  | 80 | 36   | 32 |
| E11 | KRED-P2D12  | 3  | 100  | 6  | 18 | 45   | 8  |
| E12 |             | 40 | 29   | 32 | 93 | 20   | 22 |
| F01 |             | 4  | -100 | 10 | 69 | -10  | 40 |
| F02 |             | 5  | -100 | 19 | 47 | -51  | 36 |
| F03 | KRED-P1B05  | 0  | -    | -  | 15 | -62  | 28 |
| F04 |             | 0  | -    | 0  | 40 | -41  | 32 |
| F05 |             | 38 | -55  | 52 | 94 | -26  | 24 |
| F06 |             | 13 | -39  | 24 | 89 | -22  | 31 |
| F07 | KRED-P1H08  | 7  | -100 | 17 | 84 | -73  | 28 |
| F08 |             | 7  | 100  | 24 | 88 | 63   | 38 |
| F09 |             | 6  | -4   | 34 | 65 | 14   | 41 |
| F10 |             | 16 | 33   | 21 | 93 | 22   | 27 |
| F11 |             | 12 | -54  | 17 | 94 | -18  | 27 |
| F12 |             | 26 | 100  | 63 | 87 | 83   | 34 |
| G01 |             | 0  | -    | 0  | 16 | 12   | 14 |
| G02 |             | 3  | 100  | 8  | 70 | 10   | 36 |
| G03 |             | 0  | -    | 0  | 10 | -26  | 9  |
| G04 |             | 0  | -    | 0  | 5  | -100 | 4  |
| G05 |             | 0  | -    | -  | 2  | 100  | 3  |
| G06 |             | 0  | -    | 0  | 3  | -100 | 3  |
| G07 |             | 0  | -    | 0  | 12 | -63  | 16 |



|     |            |    |      |    |    |      |    |
|-----|------------|----|------|----|----|------|----|
| G08 |            | 0  | -    | -  | 0  | -    | 0  |
| G09 |            | 0  | -    | -  | 9  | -42  | 9  |
| G10 |            | 13 | -44  | 34 | 63 | -22  | 37 |
| G11 |            | 0  | -    | -  | 4  | 7    | 18 |
| G12 |            | 0  | -    | -  | 0  | -    | 0  |
| H01 |            | 3  | -100 | 6  | 89 | -32  | 33 |
| H02 |            | 2  | -100 | 7  | 53 | -49  | 39 |
| H03 | KRED-P1B10 | 3  | 100  | 5  | 90 | 36   | 29 |
| H04 |            | 50 | -52  | 46 | 94 | -15  | 22 |
| H05 |            | 0  | -    | -  | 16 | -73  | 24 |
| H06 |            | 0  | -    | 0  | 11 | 53   | 4  |
| H07 |            | 33 | 47   | 54 | 92 | 29   | 27 |
| H08 |            | 0  | -    | -  | 12 | 58   | 5  |
| H09 |            | 22 | 58   | 21 | 69 | 68   | 26 |
| H10 | KRED-P2D03 | 3  | 100  | 5  | 75 | 17   | 22 |
| H11 |            | 8  | 100  | 13 | 90 | 73   | 31 |
| H12 |            | 0  | -    | 0  | 8  | -100 | 12 |

## 4.4. Stage 2: carrier screening

Table S8: Individual experimental steps carried out by the liquid handling robot for carrier screening (stage 2 of the presented workflow) using method A0, A1, 2 and 3 for amino-functionalized resins.

| Step | Method     | Reagents                                                                                                                                                                                                                                                | Description                                                                                                                                                                                                                                                                                                                                                                         |
|------|------------|---------------------------------------------------------------------------------------------------------------------------------------------------------------------------------------------------------------------------------------------------------|-------------------------------------------------------------------------------------------------------------------------------------------------------------------------------------------------------------------------------------------------------------------------------------------------------------------------------------------------------------------------------------|
| 1    | A0         | Amino-functionalized resin in Integra Column reservoir (see table S1)                                                                                                                                                                                   | Distributes resin (25 mg) from reservoir to reaction plate                                                                                                                                                                                                                                                                                                                          |
| 2    | A0         | Distilled water                                                                                                                                                                                                                                         | Washes resin 4 times                                                                                                                                                                                                                                                                                                                                                                |
| 3    | A0         | 25 g/L Glutaraldehyde in water                                                                                                                                                                                                                          | Adds 100 $\mu$ L 25 g/L glutaraldehyde to reaction plate<br><br>Final activation conditions:<br>200 mg/mL Resin<br>10 wt% Glutaraldehyde loading based on resin in water<br>Final immobilization volume 125 $\mu$ L                                                                                                                                                                 |
| 4    | Incubation |                                                                                                                                                                                                                                                         | Seal plate and incubate 2h at 250 rpm and 25 °C                                                                                                                                                                                                                                                                                                                                     |
| 5    | A1         | 50 mM TEoA buffer pH 7.5 + 2 mM MgSO <sub>4</sub>                                                                                                                                                                                                       | Washes resin 4 times                                                                                                                                                                                                                                                                                                                                                                |
| 6    | A1         | 50 mM TEoA buffer pH 7.5 + 2 mM MgSO <sub>4</sub>                                                                                                                                                                                                       | Adds 50 $\mu$ L Immobilization buffer                                                                                                                                                                                                                                                                                                                                               |
| 7    | A1         | 2.5 g/l SFP solution of 8 selected candidates (1 candidate per row)                                                                                                                                                                                     | Adds 50 $\mu$ L SFP dilution to reaction plates<br>Transfer 10 $\mu$ L sample to lysate benchmark plates<br><br>Final immobilization conditions:<br>200 mg/mL Resin<br>SFP concentration of 10 g/L (5 wt% loading based on resin) in<br>50 mM TEoA buffer pH 7.5 + 2 mM MgSO <sub>4</sub><br>Final immobilization volume 125 $\mu$ L                                                |
| 8    | Incubation |                                                                                                                                                                                                                                                         | Seal reaction plate and incubate 18h at 250 rpm and 25 °C<br>Seal lysate benchmark plate and store at 4°C until the reaction is setup in Step 2                                                                                                                                                                                                                                     |
| 9    | 2          | <i>Wash buffer 1:</i><br>500 mM sodium chloride solution<br><i>Wash buffer 2:</i><br>20 mM 20 mM TEoA buffer pH 7.5 + 2 mM MgSO <sub>4</sub><br><i>Wash buffer 3:</i><br>100 mM TEoA buffer pH 7.5 + 2 mM MgSO <sub>4</sub>                             | Washes resin in total 5 times, 2x wash buffer 1, 2x wash buffer 2, 1x wash buffer 3                                                                                                                                                                                                                                                                                                 |
| 10   | 2          | <i>Reagent 1:</i><br>100 mM TEoA buffer pH 7.5 + 2 mM MgSO <sub>4</sub><br><i>Reagent 2:</i><br>12.5 g/L Acetophenone<br>0.625 g/L NADP <sup>+</sup> disodium salt<br>12.5 vol% isopropanol<br>in<br>100 mM TEoA buffer pH 7.5 + 2 mM MgSO <sub>4</sub> | Adds 15 $\mu$ L reagent 1 to ONLY to the benchmark plates<br>Adds 100 $\mu$ L reagent 2 to reaction AND benchmark plates<br><br>Final reaction conditions:<br>10 g/L Acetophenone<br>0.5 g/L NADP <sup>+</sup> disodium salt<br>10 vol% isopropanol<br>in<br>100 mM TEoA buffer pH 7.5 + 2 mM MgSO <sub>4</sub> /100 $\mu$ M ZnSO <sub>4</sub><br>Final reaction volume 125 $\mu$ L |
| 11   | Incubation |                                                                                                                                                                                                                                                         | Seal reaction plate and incubate 4h at 250 rpm and 25 °C                                                                                                                                                                                                                                                                                                                            |
| 12   | 3          | MeOH                                                                                                                                                                                                                                                    | Quenches reaction plate with 125 $\mu$ L MeOH (1:1 dilution)                                                                                                                                                                                                                                                                                                                        |
| 13   | 3          | MeOH                                                                                                                                                                                                                                                    | Dilutes the reaction mixture in the analytical plate (1:10) for a final analytical dilution auf 1:20                                                                                                                                                                                                                                                                                |
| 14   | Analytcs   |                                                                                                                                                                                                                                                         | Run sample analysis on SFC                                                                                                                                                                                                                                                                                                                                                          |

Table S9: Individual experimental steps carried out by the liquid handling robot for carrier screening (stage 2 of the presented workflow) using method B1, 2 and 3 for amino-functionalized resins.

| Step | Method     | Reagents                                                                                                                                                                                                                                                | Description                                                                                                                                                                                                                                                                                                                           |
|------|------------|---------------------------------------------------------------------------------------------------------------------------------------------------------------------------------------------------------------------------------------------------------|---------------------------------------------------------------------------------------------------------------------------------------------------------------------------------------------------------------------------------------------------------------------------------------------------------------------------------------|
| 1    | B1         | Epoxy-functionalized resin in Integra Column reservoir (see table S1)                                                                                                                                                                                   | Distributes resin (25 mg) from reservoir to reaction plate                                                                                                                                                                                                                                                                            |
| 2    | B1         | 1.6 M mM TEoA buffer pH 7.5 + 2 mM MgSO <sub>4</sub>                                                                                                                                                                                                    | Washes resin 4 times                                                                                                                                                                                                                                                                                                                  |
| 3    | B1         | 1.6 M mM TEoA buffer pH 7.5 + 2 mM MgSO <sub>4</sub>                                                                                                                                                                                                    | Adds 50 µL Immobilization buffer                                                                                                                                                                                                                                                                                                      |
| 4    | B1         | 2.5 g/l SFP solution of 8 selected candidates (1 candidate per row)                                                                                                                                                                                     | Adds 50 µL SFP dilution to reaction plates<br>Transfer 10 µL sample to lysate benchmark plates<br><br><u>Final immobilization conditions:</u><br>200 mg/mL Resin<br>SFP concentration of 10 g/L (5 wt% loading based on resin) in<br>50 mM TEoA buffer pH 7.5 + 2 mM MgSO <sub>4</sub><br>Final immobilization volume 125 µL          |
| 5    | Incubation |                                                                                                                                                                                                                                                         | Seal reaction plate and incubate 18h at 250 rpm and 25 °C<br>Seal lysate benchmark plate and store at 4°C until the reaction is setup in Step 2                                                                                                                                                                                       |
| 6    | 2          | <i>Wash buffer 1:</i><br>500 mM sodium chloride solution<br><i>Wash buffer 2:</i><br>20 mM 20 mM TEoA buffer pH 7.5 + 2 mM MgSO <sub>4</sub><br><i>Wash buffer 3:</i><br>100 mM TEoA buffer pH 7.5 + 2 mM MgSO <sub>4</sub>                             | Washes resin in total 5 times, 2x wash buffer 1, 2x wash buffer 2, 1x wash buffer 3                                                                                                                                                                                                                                                   |
| 7    | 2          | <i>Reagent 1:</i><br>100 mM TEoA buffer pH 7.5 + 2 mM MgSO <sub>4</sub><br><i>Reagent 2:</i><br>12.5 g/L Acetophenone<br>0.625 g/L NADP <sup>+</sup> disodium salt<br>12.5 vol% isopropanol<br>in<br>100 mM TEoA buffer pH 7.5 + 2 mM MgSO <sub>4</sub> | Adds 15 µL reagent 1 to ONLY to the benchmark plates<br>Adds 100 µL reagent 2 to reaction AND benchmark plates<br><br>Final reaction conditions:<br>10 g/L Acetophenone<br>0.5 g/L NADP <sup>+</sup> disodium salt<br>10 vol% isopropanol<br>in<br>100 mM TEoA buffer pH 7.5 + 2 mM MgSO <sub>4</sub><br>Final reaction volume 125 µL |
| 8    | Incubation |                                                                                                                                                                                                                                                         | Seal reaction plate and incubate 4h at 250 rpm and 25 °C                                                                                                                                                                                                                                                                              |
| 9    | 3          | MeOH                                                                                                                                                                                                                                                    | Quenches reaction plate with 125 µL MeOH (1:1 dilution)                                                                                                                                                                                                                                                                               |
| 10   | 3          | MeOH                                                                                                                                                                                                                                                    | Dilutes the reaction mixture in the analytical plate (1:10) for a final analytical dilution auf 1:20                                                                                                                                                                                                                                  |
| 11   | Analytics  |                                                                                                                                                                                                                                                         | Run sample analysis on SFC                                                                                                                                                                                                                                                                                                            |

**A Stage 2: Resin Screening – What resin/immobilization technology is well suited for the enzyme?**

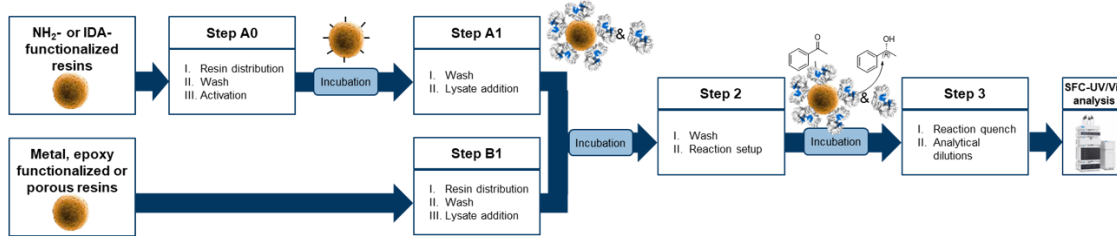

**B**

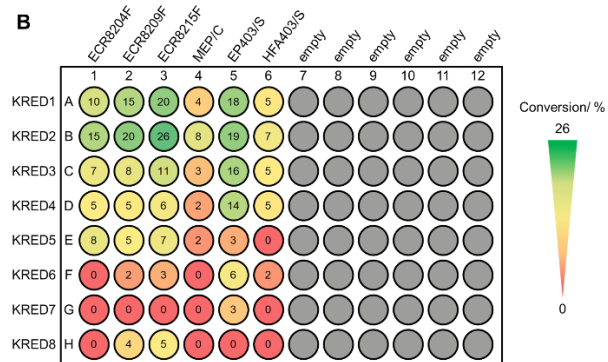

**C**

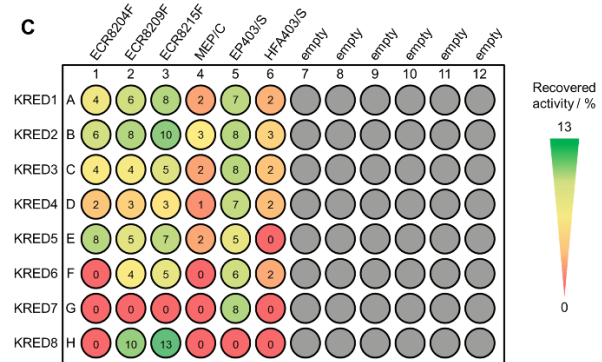

**Figure S5: Stage 2 Resin Screening – What resin and which corresponding immobilization approach is well suited for the KREDs showing the highest reduction of acetophenone (1).** (A) Schematic flow chart of the different automated steps conducted. (B) Conversion and (C) recovered activity of immobilized KRED candidates 1-8 on epoxy-functionalized carriers for the enantioselective reduction. Recovered activity is calculated by comparison of product-related conversion of immobilized enzyme vs. free enzyme and does not take immobilization efficiency into account. KRED 1-5 are highly R-selective, while KRED 6-8 are non-selective (See also Figure 3)

## 4.5. Stage 3: immobilization and reaction condition screening

Table S10: Individual steps for experiment 1 (enzyme concentration and glutaraldehyde loading), experiment 2 (buffer type & pH and enzyme concentration) and experiment 3 (refined enzyme concentration and glutaraldehyde loading) carried out by the liquid handling robot for immobilization condition screening (stage 3 of the presented workflow) using method A0, A1, 2 and 3 for the enzyme candidate 2 on ECR8304F resin.

| Step | Method     | Reagents                                                                                                                                                                                                                                                                                                                                             | Description                                                                                                                                                                                                                                                                                                                                                                                                                      |
|------|------------|------------------------------------------------------------------------------------------------------------------------------------------------------------------------------------------------------------------------------------------------------------------------------------------------------------------------------------------------------|----------------------------------------------------------------------------------------------------------------------------------------------------------------------------------------------------------------------------------------------------------------------------------------------------------------------------------------------------------------------------------------------------------------------------------|
| 1    | A0         | Purolite ECR8304F Resin (suspension in distilled water)                                                                                                                                                                                                                                                                                              | Distributes resin (25 mg) from reservoir to reaction plate                                                                                                                                                                                                                                                                                                                                                                       |
| 2    | A0         | Distilled water                                                                                                                                                                                                                                                                                                                                      | Washes resin 4 times                                                                                                                                                                                                                                                                                                                                                                                                             |
| 3    | A0         | <i>Experiment 1&amp;3:</i><br>Serial dilution of 1.6-200 g/L Gluteraldehyde in water<br><i>Experiment 2:</i><br>25 g/L Gluteraldehyde in water                                                                                                                                                                                                       | Adds 100 µL glutaraldehyde solution to reaction plate<br><br>Final activation conditions:<br>200 mg/mL Resin<br><br><i>Experiment 1&amp;3:</i><br>0.6-80 wt% Glutaraldehyde loading based on resin<br><i>Experiment 2:</i><br>10 wt% Glutaraldehyde loading based on resin<br><br>in<br>water<br>Final immobilization volume 125 µL                                                                                              |
| 4    | Incubation |                                                                                                                                                                                                                                                                                                                                                      | Seal plate and incubate 2h at 250 rpm and 25 °C                                                                                                                                                                                                                                                                                                                                                                                  |
| 5    | A1         | <i>Experiment 1&amp;3:</i><br>50 mM TEoA buffer pH 7.5 + 2 mM MgSO <sub>4</sub><br><i>Experiment 2:</i><br>Integra Column Revervoirs filled with different buffers<br>50 mM TEoA buffer pH 7/7.5/8 or<br>50 mM MOPS buffer pH 7/7.5 or<br>50 mM Tris buffer pH 7.5/8/8.5/9 or<br>50 mM KP <sub>i</sub> buffer pH 7/7.5/8<br>+ 2 mM MgSO <sub>4</sub> | Washes resin 4 times                                                                                                                                                                                                                                                                                                                                                                                                             |
| 6    | A1         | <i>Experiment 1&amp;3:</i><br>50 mM TEoA buffer pH 7.5 + 2 mM MgSO <sub>4</sub><br><i>Experiment 2:</i><br>Different buffers<br>50 mM TEoA buffer pH 7/7.5/8 or<br>50 mM MOPS buffer pH 7/7.5 or<br>50 mM Tris buffer pH 7.5/8/8.5/9 or<br>50 mM KP <sub>i</sub> buffer pH 7/7.5/8<br>+ 2 mM MgSO <sub>4</sub>                                       | Adds 50 µL Immobilization buffer                                                                                                                                                                                                                                                                                                                                                                                                 |
| 7    | A1         | <i>Experiment 1:</i><br>Serial dilution of 0-200 g/L SFP (KRED 2) in immobilization buffer<br><i>Experiment 2:</i><br>Serial dilution of 0-100 g/L SFP (KRED 2) in immobilization buffer<br><i>Experiment 3:</i><br>Adjusted serial dilution of 0-200 g/L SFP (KRED 2) in immobilization buffer                                                      | Adds 50 µL SFP dilution to reaction plates<br>Transfer 10 µL sample to lysate benchmark plates<br><br>Final immobilization conditions:<br>200 mg/mL Resin<br><br><i>Experiment 1:</i><br>SFP concentration of 0-80 g/L (0-40 wt% SFP loading based on resin)<br>in<br>50 mM TEoA buffer pH 7.5 + 2 mM MgSO <sub>4</sub><br><br><i>Experiment 2:</i><br>SFP concentration of 0-40 g/L (0-20 wt% SFP loading based on resin)<br>in |

|    |            |                                                                                                                                                                                                                                                     |                                                                                                                                                                                                                                                                                                                                       |
|----|------------|-----------------------------------------------------------------------------------------------------------------------------------------------------------------------------------------------------------------------------------------------------|---------------------------------------------------------------------------------------------------------------------------------------------------------------------------------------------------------------------------------------------------------------------------------------------------------------------------------------|
|    |            |                                                                                                                                                                                                                                                     | different buffers + 2 mM MgSO <sub>4</sub><br><i>Experiment 3:</i><br>SFP concentration of 0-80 g/L (0-40 wt% SFP loading based on resin)<br>in<br>50 mM TEoA buffer pH 7.5 + 2 mM MgSO <sub>4</sub><br>Final immobilization volume 125 µL                                                                                            |
| 8  | Incubation |                                                                                                                                                                                                                                                     | Seal reaction plate and incubate 18h at 250 rpm and 25 °C                                                                                                                                                                                                                                                                             |
| 9  | 2          | <i>Wash buffer 1:</i><br>500 mM sodium chloride solution<br><i>Wash buffer 2:</i><br>20 mM 20 mM TEoA buffer pH 7.5 + 2 mM MgSO <sub>4</sub><br><i>Wash buffer 3:</i><br>100 mM TEoA buffer pH 7.5 + 2 mM MgSO <sub>4</sub>                         | Washes resin in total 5 times, 2x wash buffer 1, 2x wash buffer 2, 1x wash buffer 3                                                                                                                                                                                                                                                   |
| 10 | 2          | <i>Reagent 1:</i><br>100 mM TEoA buffer pH 7.5 + 2 mM MgSO <sub>4</sub><br><i>Reagent 2:</i><br>25 g/L Acetophenone<br>0.625 g/L NADP <sup>+</sup> disodium salt<br>25 vol% isopropanol<br>in<br>100 mM TEoA buffer pH 7.5 + 2 mM MgSO <sub>4</sub> | Adds 15 µL reagent 1 to ONLY to the benchmark plates<br>Adds 100 µL reagent 2 to reaction AND benchmark plates<br><br>Final reaction conditions:<br>20 g/L Acetophenone<br>0.5 g/L NADP <sup>+</sup> disodium salt<br>20 vol% isopropanol<br>in<br>100 mM TEoA buffer pH 7.5 + 2 mM MgSO <sub>4</sub><br>Final reaction volume 125 µL |
| 11 | Incubation |                                                                                                                                                                                                                                                     | <i>Experiment 1&amp;2:</i><br>Seal reaction plate and incubate 4h at 250 rpm and 25 °C<br><i>Experiment 1&amp;2:</i><br>Seal reaction plate and incubate 20 min at 250 rpm and 25 °C                                                                                                                                                  |
| 12 | 3          | MeOH                                                                                                                                                                                                                                                | Quenches reaction plate with 125 µL MeOH (1:1 dilution)                                                                                                                                                                                                                                                                               |
| 13 | 3          | MeOH                                                                                                                                                                                                                                                | Dilutes the reaction mixture in the analytical plate (1:20) for a final analytical dilution auf 1:40                                                                                                                                                                                                                                  |
| 14 | Analytics  |                                                                                                                                                                                                                                                     | Run sample analysis on SFC                                                                                                                                                                                                                                                                                                            |

Table S11: Individual steps for experiment 4 (isopropanol concentration and acetophenone concentration), experiment 5 (buffer type & pH and NADP concentration) and experiment 6 (refined buffer type & pH and NADP concentration) carried out by the liquid handling robot for reaction condition screening (stage 3 of the presented workflow) using method A0, A1, 2 and 3 for the enzyme candidate 2 on ECR8304F resin.

| Step | Method     | Reagents                                                                                                                                                                                                                                                                                                                                                                                                                                                    | Description                                                                                                                                                                                                                                                                                                                                                                                                                                                                                                                     |
|------|------------|-------------------------------------------------------------------------------------------------------------------------------------------------------------------------------------------------------------------------------------------------------------------------------------------------------------------------------------------------------------------------------------------------------------------------------------------------------------|---------------------------------------------------------------------------------------------------------------------------------------------------------------------------------------------------------------------------------------------------------------------------------------------------------------------------------------------------------------------------------------------------------------------------------------------------------------------------------------------------------------------------------|
| 1    | A0         | Purolite ECR8304F Resin (suspension in distilled water)                                                                                                                                                                                                                                                                                                                                                                                                     | Distributes resin (25 mg) from reservoir to reaction plate                                                                                                                                                                                                                                                                                                                                                                                                                                                                      |
| 2    | A0         | Distilled water                                                                                                                                                                                                                                                                                                                                                                                                                                             | Washes resin 4 times                                                                                                                                                                                                                                                                                                                                                                                                                                                                                                            |
| 3    | A0         | 3.1 g/L Glutaraldehyde in water                                                                                                                                                                                                                                                                                                                                                                                                                             | Adds 100 $\mu$ L glutaraldehyde solution to reaction plate<br><br>Final activation conditions:<br>200 mg/mL Resin<br>1.3 wt% Glutaraldehyde loading based on resin in water<br>Final immobilization volume 125 $\mu$ L                                                                                                                                                                                                                                                                                                          |
| 4    | Incubation |                                                                                                                                                                                                                                                                                                                                                                                                                                                             | Seal plate and incubate 2h at 250 rpm and 25 $^{\circ}$ C                                                                                                                                                                                                                                                                                                                                                                                                                                                                       |
| 5    | A1         | 50 mM Tris HCl buffer pH 7.5 + 2 mM MgSO <sub>4</sub>                                                                                                                                                                                                                                                                                                                                                                                                       | Washes resin 4 times                                                                                                                                                                                                                                                                                                                                                                                                                                                                                                            |
| 6    | A1         | 50 mM Tris HCl buffer pH 7.5 + 2 mM MgSO <sub>4</sub>                                                                                                                                                                                                                                                                                                                                                                                                       | Adds 50 $\mu$ L Immobilization buffer                                                                                                                                                                                                                                                                                                                                                                                                                                                                                           |
| 7    | A1         | 25 g/L SFP (KRED 2) in immobilization buffer                                                                                                                                                                                                                                                                                                                                                                                                                | Adds 50 $\mu$ L SFP dilution to reaction plates<br>Transfer 10 $\mu$ L sample to lysate benchmark plates<br><br>Final immobilization conditions:<br>200 mg/mL Resin<br>SFP concentration of 10 g/L (5 wt% SFP loading based on resin) in<br>50 mM Tris HCl buffer pH 7.5 + 2 mM MgSO <sub>4</sub><br>Final immobilization volume 125 $\mu$ L                                                                                                                                                                                    |
| 8    | Incubation |                                                                                                                                                                                                                                                                                                                                                                                                                                                             | Seal reaction plate and incubate 18h at 250 rpm and 25 $^{\circ}$ C                                                                                                                                                                                                                                                                                                                                                                                                                                                             |
| 9    | 2          | <i>Experiment 1:</i><br><i>Wash buffer 1:</i><br>500 mM sodium chloride solution<br><i>Wash buffer 2:</i><br>20 mM TEoA buffer pH 7.5 + 2 mM MgSO <sub>4</sub><br><i>Wash buffer 3:</i><br>100 mM TEoA buffer pH 7.5 + 2 mM MgSO <sub>4</sub><br><i>Experiment 1:</i><br><i>Wash buffer 1:</i><br>500 mM sodium chloride solution<br><i>Wash buffer 2:</i><br>20 mM TEoA buffer pH 7.5 + 2 mM MgSO <sub>4</sub><br><i>Wash buffer 3:</i><br>distilled water | Washes resin in total 5 times, 2x wash buffer 1, 2x wash buffer 2, 1x wash buffer 3                                                                                                                                                                                                                                                                                                                                                                                                                                             |
| 10   | 2          | <i>Experiment 1:</i><br><i>Reagent 1:</i><br>Serial dilution of 50-375 g/L acetophenone in isopropanol<br><i>Reagent 2:</i><br>Serial dilution of 0-100 vol% isopropanol in<br>100 mM TEoA buffer pH 7.5 + 2 mM MgSO <sub>4</sub><br><br><i>Experiment 2:</i><br><i>Reagent 1:</i><br>50 g/L acetophenone in                                                                                                                                                | <i>Note: Add 15 <math>\mu</math>L to benchmark plates prior to processing</i><br>Adds 50 $\mu$ L reagent 1 to reaction AND benchmark plates<br>Adds 50 $\mu$ L reagent 2 to reaction AND benchmark plates<br><br>Final reaction conditions:<br><br><i>Experiment 1:</i><br>20 -150 g/L Acetophenone<br>0.5 g/L NADP <sup>+</sup> disodium salt<br>25-78 vol% isopropanol in<br>100 mM TEoA buffer pH 7.5 + 2 mM MgSO <sub>4</sub><br><br><i>Experiment 2:</i><br>20 g/L acetophenone<br>0-1 g/L NADP <sup>+</sup> disodium salt |

|    |            |                                                                                                                                                                                                                                                                                                                                                                                                                                                                                                                                                                                                                                                                                                                                              |                                                                                                                                                                                                                                                                             |
|----|------------|----------------------------------------------------------------------------------------------------------------------------------------------------------------------------------------------------------------------------------------------------------------------------------------------------------------------------------------------------------------------------------------------------------------------------------------------------------------------------------------------------------------------------------------------------------------------------------------------------------------------------------------------------------------------------------------------------------------------------------------------|-----------------------------------------------------------------------------------------------------------------------------------------------------------------------------------------------------------------------------------------------------------------------------|
|    |            | <p>75 vol% isopropanol in water + 2.5 mM MgSO<sub>4</sub></p> <p><i>Reagent 2:</i><br/>0-2.5 g/L NADP<sup>+</sup> disodium salt<br/>in<br/>different buffers<br/>125 mM TEoA buffer pH 7/7.5/8 or<br/>125 mM MOPS buffer pH 7/7.5 or<br/>125 mM Tris buffer pH 7.5/8/8.5/9 or<br/>125 mM KP<sub>i</sub> buffer pH 7/7.5/8</p> <p><i>Experiment 3:</i><br/><i>Reagent 1:</i><br/>50 g/L acetophenone<br/>in<br/>75 vol% isopropanol in water +<br/>2.5 mM MgSO<sub>4</sub></p> <p><i>Reagent 2:</i><br/>0-10 g/L NADP<sup>+</sup> disodium salt<br/>in<br/>different buffers<br/>125 mM TEoA buffer pH 7/7.5/8 or<br/>125 mM MOPS buffer pH 7/7.5 or<br/>125 mM Tris buffer pH 7.5/8/8.5/9 or<br/>125 mM KP<sub>i</sub> buffer pH 7/7.5/8</p> | <p>30 vol% isopropanol<br/>in<br/>different buffers</p> <p><i>Experiment 3:</i><br/>20 g/L acetophenone<br/>0-4 g/L NADP<sup>+</sup> disodium salt<br/>30 vol% isopropanol<br/>in<br/>different buffers (final concentration 50 mM)</p> <p>Final reaction volume 125 µL</p> |
| 11 | Incubation |                                                                                                                                                                                                                                                                                                                                                                                                                                                                                                                                                                                                                                                                                                                                              | <p><i>Experiment 1:</i><br/>Seal reaction plate and incubate 4h at 250 rpm and 25 °C</p> <p><i>Experiment 2&amp;3:</i><br/>Seal reaction plate and incubate 20 min at 250 rpm and 25 °C</p>                                                                                 |
| 12 | 3          | MeOH                                                                                                                                                                                                                                                                                                                                                                                                                                                                                                                                                                                                                                                                                                                                         | Quenches reaction plate with 125 µL MeOH (1:1 dilution)                                                                                                                                                                                                                     |
| 13 | 3          | MeOH                                                                                                                                                                                                                                                                                                                                                                                                                                                                                                                                                                                                                                                                                                                                         | Dilutes the reaction mixture in the analytical plate (1:20) for a final analytical dilution auf 1:40                                                                                                                                                                        |
| 14 | Analytics  |                                                                                                                                                                                                                                                                                                                                                                                                                                                                                                                                                                                                                                                                                                                                              | Run sample analysis on SFC                                                                                                                                                                                                                                                  |



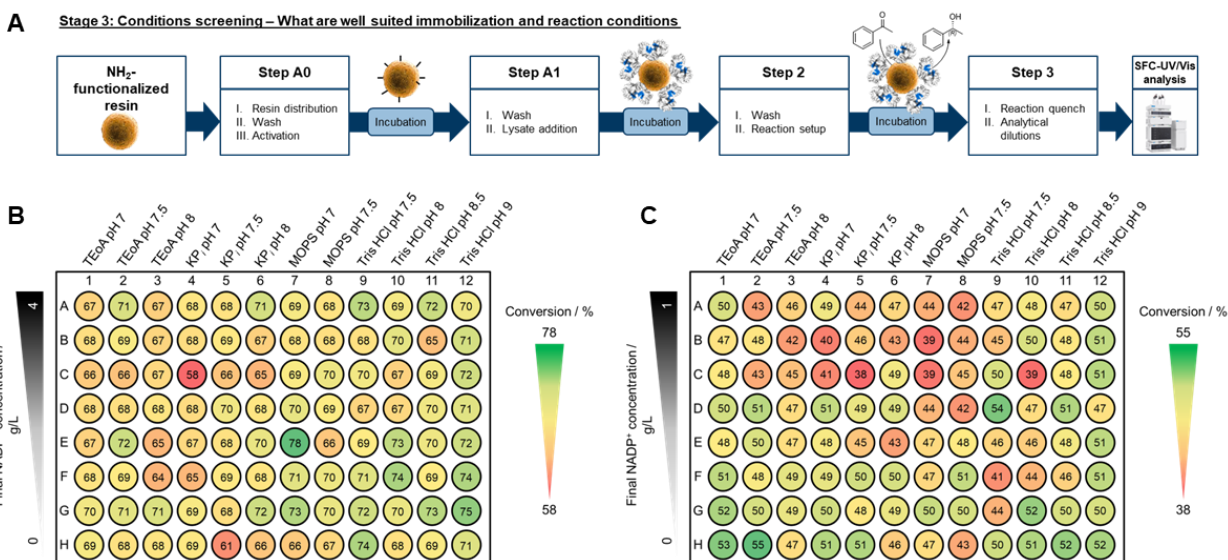

Figure S6: **Stage 3B Reaction conditions screening – Can the reaction conditions be optimized for lower cofactor concentrations and thus lower costs and carbon footprint.** 2D heat maps of different key reaction parameters after 2h incubation of immobilized KRED on ECR8304F resin with varying buffer type and pH and NADP<sup>+</sup> concentration. **(A)** Schematic flow chart of the different automated steps conducted. **(B,C)** 2D heat maps of the conversion of 20 g/L acetophenone with varying NADP<sup>+</sup> concentration and 30 vol% isopropanol with immobilized KRED 2 on ECR8304F resin at 25°C. Immobilization was conducted under optimized conditions identified in Stage 3A (0.0125 g/g<sub>resin</sub> glutaraldehyde loading and 0.053 g/g<sub>resin</sub> enzyme loading in 75 mM Tris HCl pH 7.5 buffer: **(B)** Conversion of acetophenone (1) towards the desired (*R*)-2 product with varying NADP<sup>+</sup> concentrations from row A to H and varying buffer types and pH in column 1-12. **(C)** reproduction of previous with higher NADP<sup>+</sup> concentration - Conversion of acetophenone (1) towards the desired (*R*)-2 product with varying NADP<sup>+</sup> concentrations from row A to H and varying buffer types and pH in column 1-12.

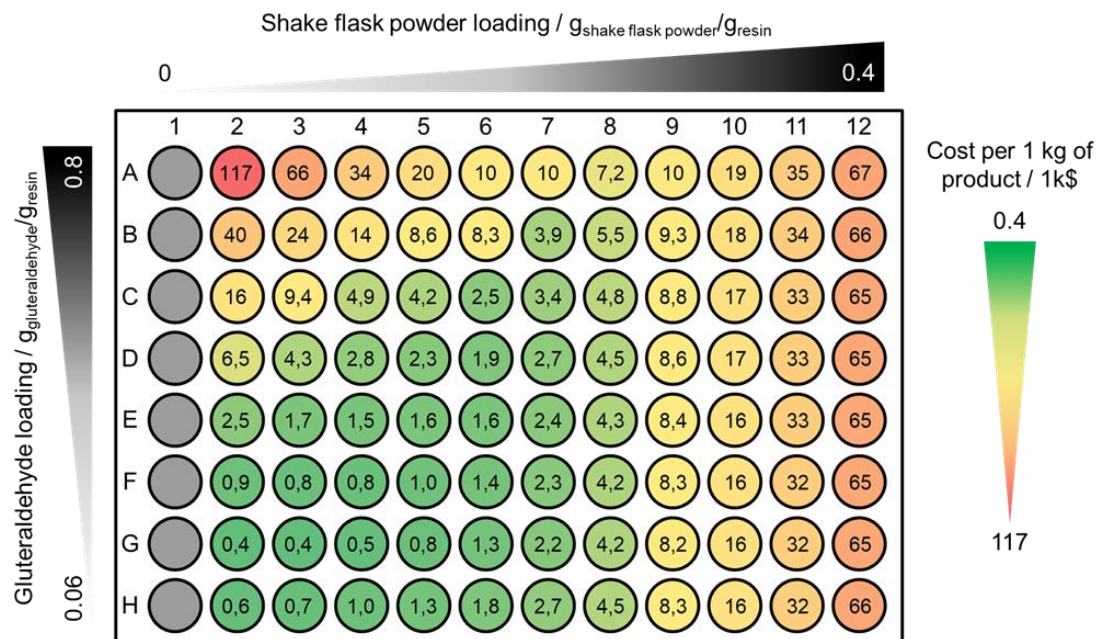

Figure S7: 2D heat maps of the cost in 1000\$ per kg of product with varying glutaraldehyde and enzyme concentration analogues to the conditions described in figure 5B. Calculation is based on the cost of glutaraldehyde and enzyme in each well according to table S13.

## 4.6. Stage 4: Scale up of immobilization and biocatalytic reaction

### 4.6.1 Immobilization procedure upscaled in SPE tubes

#### Immobilization conditions based on literature

- 2 g wet resin (resin:buffer ratio 1:5)
- 16 g/L glutaraldehyde solution ( $0.08 \text{ g}_{\text{GA}}/\text{g}_{\text{resin}}$ )
- 31.2 g/L SFP ( $0.156 \text{ g}_{\text{SFP}}/\text{g}_{\text{resin}}$ ) of KRED 2
- 10 mL 75 mM TEoA buffer pH 7

Transfer 2 g of wet Resin to 20 mL SPE tube and wash 3 times with 10 mL of 50 mM Tris HCl pH 7.5. Prepare 10 mL 16 g/L glutaraldehyde solution by diluting 320  $\mu\text{L}$  of 50 wt% glutaraldehyde stock solution with 9.68 mL water. Add glutaraldehyde solution to SPE tube and incubate vertically in Eppendorf shaker for 2 hours at 25°C. Wash 4 times with water and once with 50 mM TEoA pH 7.5. Prepare 10 mL 10.6 g/L KRED shake flask powder (KRED 2) stock solution by dissolving 312 mg of KRED SFP in 10 mL of 100 mM TEoA pH 7.5. Add 10 mL of enzyme stock solution and incubate vertically in Eppendorf shaker for 18 hours at 25°C. Remove supernatant and wash 2 times with 0.5 M NaCl solution and 3 times with 100 mM Tris HCl pH 7.5.

#### Immobilization conditions with optimized conditions

- 2 g wet resin (resin:buffer ratio 1:5)
- 2.5 g/L glutaraldehyde solution ( $0.0125 \text{ g}_{\text{GA}}/\text{g}_{\text{resin}}$ )
- 10.6 g/L SFP ( $0.053 \text{ g}_{\text{SFP}}/\text{g}_{\text{resin}}$ ) of KRED 2
- 10 mL 75 mM Tris HCl buffer pH 7.5

Transfer 2 g of wet Resin to 20 mL SPE tube and wash 3 times with 10 mL of 50 mM Tris HCl pH 7.5. Prepare 10 mL 2.5 g/L glutaraldehyde solution by diluting 50  $\mu\text{L}$  of 50 wt% glutaraldehyde stock solution with 9.95 mL water. Add glutaraldehyde solution to SPE tube and incubate vertically in Eppendorf shaker for 2 hours at 25°C. Wash 4 times with water and once with 50 mM Tris HCl pH 7.5. Prepare 10 mL 10.6 g/L KRED shake flask powder (KRED 2) stock solution by dissolving 106 mg of KRED SFP in 10 mL of 100 mM Tris HCl pH 7.5. Add 10 mL of enzyme stock solution and incubate vertically in Eppendorf shaker for 18 hours at 25°C. Remove supernatant and wash 2 times with 0.5 M NaCl solution and 3 times with 100 mM Tris HCl pH 7.5.

## 4.6.2 Scale-Up of biocatalytic reaction with immobilized enzymes

### Reaction conditions based on literature

- 0.1 M acetophenone
- 0.5 g/L NADP<sup>+</sup>
- 800 mg enzyme-loaded resin
- 20 vol% IPA
- 100 mM TEOA pH 7.5
- Final reaction volume 4 mL
- 25 °C, 24 h
- Samples taken after 1, 2, 4, 8 and 24 hours

Weigh 800 mg of each wet resin into 20 mL SPE tube. Prepare 12 mL reaction solution by mixing 0.144 g acetophenone, 6 mg NADP<sup>+</sup>, 2.4 mL isopropanol, 7.2 mL 125 mM TEOA pH 7.5, 24 µL 1 M MgSO<sub>4</sub> solution and 2.232 mL water in a 15 mL tube. Add 4 mL substrate stock solution to each resin and shake vertically at 25 °C and 900 rpm for 24 hours. Take 15 µL aliquots after 1, 2, 4, 8 and 24 hours and dilute in 1.5 mL MeOH (1 g/L final conc.) before analyzing via SFC.

### Reaction conditions with optimized conditions

- 1.25 M acetophenone
- 800 mg enzyme-loaded resin
- 55 vol% IPA
- 100 mM Tris HCl pH 7.5
- Final reaction volume 4 mL
- 25 °C, 24 h
- Samples taken after 1, 2, 4, 8 and 24 hours

Weigh 800 mg of each wet resin into 20 mL SPE tube. Prepare 12 mL reaction solution by mixing 1.8 g acetophenone, 6.6 mL isopropanol, 1.8 mL 500 mM Tris HCl pH 7.5, 24 µL 1 M MgSO<sub>4</sub> solution and 1.776 mL water in a 15 mL tube. Add 4 mL substrate stock solution to each resin and shake vertically at 25 °C and 900 rpm for 24 hours. Take 15 µL aliquots after 1, 2, 4, 8 and 24 hours and dilute in 1.5 mL MeOH (1 g/L final conc.) before analyzing via SFC.

To prove that our screening resulted in a better process compared to what one could identify from existing procedures we conducted four upscaling experiments: Two immobilizations, one with our optimized immobilization conditions and another one with conditions that could be considered “standard” based on reported work. We tested both formulations in our optimized reaction conditions as well as in conditions that could be considered “standard” when starting a biocatalytic process development monitoring the conversion for 24 hours. The reaction setup following the literature conditions were completed within the first hour and observed conversion was >92 % for every sample taken with >99% ee to the desired *R*-enantiomer. The reaction setup following the optimized conditions showed a reaction kinetic over the full 24 hours independent from the

immobilization procedure. Conversions of the two reactions are given in table S12 and enantioselectivity was measured with >99% ee to the desired *R*-enantiomer in all samples.

Table S12: Time-dependent conversion of the test reaction using 1.25 M acetophenone and 20 wt% resin loading 55 vol% isopropanol in 100 mM Tris HCl buffer pH 7.5. The resin was prepared either under standard literature conditions or with optimized conditions.

| Time / h | Immobilisation based on literature conditions | Immobilisation based on optimized conditions |
|----------|-----------------------------------------------|----------------------------------------------|
| 1        | 40%                                           | 40%                                          |
| 2        | 52%                                           | 53%                                          |
| 4        | 62%                                           | 64%                                          |
| 8        | 69%                                           | 69%                                          |
| 24       | 73%                                           | 73%                                          |

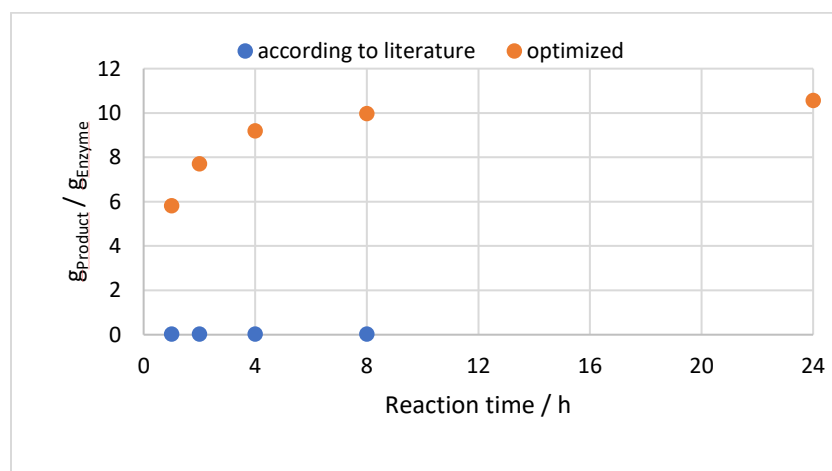

Figure S8: Time-dependent catalyst productivity plot comparing the literature conditions and the optimized conditions following our workflow. The biocatalytic reduction of acetophenone (**1**, 12/150 g/L) in 20/55 vol% isopropanol towards (*R*)-**2** using immobilized KRED 2 over 24 hours (see table 1 and ESI chapter 4.6.).

Table S13: Cost contribution for reagents used for the synthesis of 1 kg of product (*R*) **2** using optimized conditions presented in Table 1. Prices are from October 2022 and estimated based on listing from chemical vendors but heavily depend on market situation and scale in all cases.

| <b>Cost related to ... for<br/>1 kg product</b> | <b>Typical conditions taken from<br/>literature</b> | <b>Optimized process using our<br/>workflow</b> |
|-------------------------------------------------|-----------------------------------------------------|-------------------------------------------------|
| Gluteraldehyde<br>(250 \$/kg)                   | 340 \$                                              | 5 \$                                            |
| Enzyme<br>(15000 \$/kg)                         | 38000 \$                                            | 1400 \$                                         |
| NADP<br>(100000 \$/kg)                          | 4300 \$                                             | 0 \$                                            |
| Resin<br>(900 \$/kg)                            | 15000 \$                                            | 1600 \$                                         |
| <b>Total</b>                                    | <b>57640 \$</b>                                     | <b>3000 \$</b>                                  |

## Literature

- 1 R. A. Sheldon and S. van Pelt, *Chem. Soc. Rev.*, 2013, **42**, 6223
